# Supplementary material
Source: PubMed Central journal article supplement (PMC7724318)
Supplement: ajtr0012-7510-f9.pdf [file ajtr0012-7510-f9.pdf]

## Hazard infiltrating immune cells in bladder urothelial carcinoma

**Table S2.** Calculation of TIICs for 408 BLCA patients in TCGA cohort

| id           | grade      | stage     | T   | M  | N  | TIICs       |
|--------------|------------|-----------|-----|----|----|-------------|
| TCGA-2F-A9KO | High Grade | Stage IV  | T3  | M0 | N1 | 0.683920304 |
| TCGA-2F-A9KP | High Grade | Stage IV  | T3a | MX | N2 | 0.883436088 |
| TCGA-2F-A9KQ | High Grade | Stage III | T3a | M0 | N0 | 0.93463941  |
| TCGA-2F-A9KR | High Grade | Stage III | T3a | M0 | N0 | 0.817450142 |
| TCGA-2F-A9KT | High Grade | Stage II  | T2b | M0 | N0 | 1.356010115 |
| TCGA-2F-A9KW | High Grade | Stage III | T3b | MX | N0 | 1.834153452 |
| TCGA-4Z-AA7M | High Grade | Stage III | T3a | M0 | N0 | 1.439521732 |
| TCGA-4Z-AA7N | High Grade | Stage III | T3a | M0 | N0 | 0.918089037 |
| TCGA-4Z-AA7O | High Grade | Stage II  | T2a | M0 | N0 | 0.769649779 |
| TCGA-4Z-AA7Q | High Grade | Stage III | T3a | M0 | NX | 0.705648474 |
| TCGA-4Z-AA7R | High Grade | Stage IV  | T4b | M0 | N0 | 1.443399834 |
| TCGA-4Z-AA7S | High Grade | Stage III | T4a | M0 | N0 | 1.05670457  |
| TCGA-4Z-AA7W | High Grade | Stage II  | T2a | M0 | N0 | 0.526397804 |
| TCGA-4Z-AA7Y | High Grade | Stage II  | T2a | M0 | N0 | 0.59456785  |
| TCGA-4Z-AA80 | High Grade | Stage II  | T2a | M0 | N0 | 0.829935732 |
| TCGA-4Z-AA81 | High Grade | Stage II  | T2b | M0 | N0 | 0.500544767 |
| TCGA-4Z-AA82 | High Grade | Stage IV  | T2a | M0 | N1 | 0.776417775 |
| TCGA-4Z-AA83 | High Grade | Stage II  | T2a | M0 | N0 | 1.320437336 |
| TCGA-4Z-AA84 | High Grade | Stage IV  | T3a | M1 | N2 | 1.409568101 |
| TCGA-4Z-AA86 | High Grade | Stage IV  | T3a | M0 | N1 | 1.086230465 |
| TCGA-4Z-AA87 | High Grade | Stage III | T4a | M0 | N0 | 0.675161901 |
| TCGA-4Z-AA89 | High Grade | Stage IV  | T4b | M0 | N0 | 0.854195461 |
| TCGA-5N-A9KI | High Grade | Stage III | T4  | MX | NX | 1.563734587 |
| TCGA-5N-A9KM | High Grade | Stage III | T4a | MX | N0 | 0.740698316 |
| TCGA-BL-A0C8 | High Grade | Stage I   | T1  | M0 | NX | 1.363869489 |
| TCGA-BL-A13I | High Grade | Stage III | T3  | M0 | N0 | 2.001884188 |
| TCGA-BL-A13J | High Grade | Stage IV  | T4  | M0 | N2 | 1.317075105 |
| TCGA-BL-A3JM | High Grade | Stage III | T3  | M0 | N0 | 1.5849429   |
| TCGA-BL-A5ZZ | High Grade | Stage III | T4a | MX | N0 | 2.154435019 |
| TCGA-BT-A0S7 | High Grade | Stage III | T4a | MX | N0 | 1.376867593 |
| TCGA-BT-A0YX | High Grade | Stage III | T3b | M0 | N0 | 0.618917068 |
| TCGA-BT-A20J | High Grade | Stage II  | T2b | MX | N0 | 0.924166625 |
| TCGA-BT-A20N | High Grade | Stage III | T3a | MX | N0 | 0.909699306 |
| TCGA-BT-A20O | High Grade | Stage III | T3a | MX | N0 | 0.540651663 |
| TCGA-BT-A20P | High Grade | Stage III | T3a | M0 | N0 | 1.174150909 |
| TCGA-BT-A20Q | High Grade | Stage IV  | T3b | M0 | N2 | 0.624274877 |
| TCGA-BT-A20R | High Grade | Stage IV  | T3b | M0 | N1 | 2.206138918 |
| TCGA-BT-A20T | High Grade | Stage IV  | T3b | M0 | N1 | 0.85639506  |
| TCGA-BT-A20U | High Grade | Stage III | T3a | M0 | N0 | 1.520611926 |
| TCGA-BT-A20V | High Grade | Stage IV  | T4a | M0 | N2 | 0.63577793  |
| TCGA-BT-A20W | High Grade | Stage II  | T2b | M0 | N0 | 0.757821809 |
| TCGA-BT-A20X | High Grade | Stage IV  | T4a | M0 | N2 | 1.047349061 |
| TCGA-BT-A2LA | High Grade | Stage III | T3a | M0 | N0 | 0.752603971 |
| TCGA-BT-A2LB | High Grade | Stage III | T3a | M0 | N0 | 0.828332265 |
| TCGA-BT-A2LD | High Grade | Stage IV  | T3a | M0 | N1 | 1.174332924 |
| TCGA-BT-A3PH | High Grade | Stage IV  | T3b | MX | N2 | 1.388007925 |
| TCGA-BT-A3PJ | High Grade | Stage III | T3b | M0 | N0 | 0.984632231 |

## Hazard infiltrating immune cells in bladder urothelial carcinoma

|              |            |           |        |    |    |              |
|--------------|------------|-----------|--------|----|----|--------------|
| TCGA-BT-A3PK | High Grade | Stage II  | T2b    | MX | NO | 1.547997221  |
| TCGA-BT-A42C | High Grade | Stage II  | unknow | M0 | NO | 1.162320698  |
| TCGA-BT-A42E | High Grade | Stage III | T3a    | M0 | NO | 0.956479182  |
| TCGA-BT-A42F | High Grade | Stage IV  | T4a    | MX | N1 | 1.017226529  |
| TCGA-C4-A0EZ | High Grade | Stage IV  | T3a    | M1 | N1 | 1.282433159  |
| TCGA-C4-A0FO | High Grade | Stage II  | T2b    | M0 | NO | 0.767125462  |
| TCGA-C4-A0F1 | High Grade | Stage III | T3b    | M0 | NO | 1.111381359  |
| TCGA-C4-A0F6 | High Grade | Stage III | T3b    | M0 | NO | 1.2234449302 |
| TCGA-C4-A0F7 | High Grade | Stage IV  | T4b    | M0 | N2 | 1.130752052  |
| TCGA-CF-A1HR | High Grade | Stage III | T3     | M0 | NO | 0.742577198  |
| TCGA-CF-A1HS | High Grade | Stage III | T3     | M0 | NO | 0.930309859  |
| TCGA-CF-A27C | High Grade | Stage III | T3     | M0 | NO | 0.611498691  |
| TCGA-CF-A3MF | Low Grade  | Stage III | T3     | M0 | NO | 0.9458314    |
| TCGA-CF-A3MG | Low Grade  | Stage II  | T2     | M0 | NO | 0.648283704  |
| TCGA-CF-A3MH | Low Grade  | Stage II  | T2     | M0 | NO | 0.83744966   |
| TCGA-CF-A3MI | Low Grade  | Stage II  | T2     | M0 | NO | 1.104596238  |
| TCGA-CF-A47S | Low Grade  | Stage II  | T2     | M0 | NO | 0.773095847  |
| TCGA-CF-A47T | Low Grade  | Stage II  | T2     | M0 | NO | 0.717438398  |
| TCGA-CF-A47V | High Grade | Stage II  | T2     | M0 | NO | 0.572367299  |
| TCGA-CF-A47W | Low Grade  | Stage II  | T2     | M0 | NO | 0.960075144  |
| TCGA-CF-A47X | Low Grade  | Stage II  | T2     | M0 | NO | 0.901035979  |
| TCGA-CF-A47Y | Low Grade  | Stage II  | T2     | M0 | NO | 0.846935335  |
| TCGA-CF-A5U8 | Low Grade  | Stage II  | T2     | M0 | NO | 0.797548368  |
| TCGA-CF-A5UA | Low Grade  | Stage II  | T2     | M0 | NO | 0.817855417  |
| TCGA-CF-A7I0 | Low Grade  | Stage II  | T2     | M0 | NO | 0.59020841   |
| TCGA-CF-A8HX | High Grade | Stage II  | T2     | M0 | NO | 1.042317161  |
| TCGA-CF-A8HY | High Grade | Stage II  | T2     | M0 | NO | 0.427898604  |
| TCGA-CF-A9FF | High Grade | Stage II  | T2     | M0 | NO | 0.851489259  |
| TCGA-CF-A9FH | Low Grade  | Stage II  | T2     | M0 | NO | 0.9729523    |
| TCGA-CF-A9FL | High Grade | Stage III | T3b    | M0 | NO | 1.173754695  |
| TCGA-CF-A9FM | High Grade | Stage I   | T1     | M0 | NO | 0.935923951  |
| TCGA-CU-A0YN | High Grade | Stage III | T3a    | M0 | NO | 1.292819062  |
| TCGA-CU-A0YO | High Grade | Stage IV  | T3a    | MX | N2 | 0.825692315  |
| TCGA-CU-A0YR | High Grade | Stage IV  | T2     | M0 | N2 | 1.327869135  |
| TCGA-CU-A3KJ | High Grade | Stage III | T3b    | M0 | NO | 1.025964939  |
| TCGA-CU-A3QU | High Grade | Stage IV  | T2b    | M0 | N1 | 1.4917178    |
| TCGA-CU-A3YL | High Grade | Stage III | T4a    | M0 | NO | 0.628429154  |
| TCGA-CU-A5W6 | High Grade | Stage III | T4a    | M0 | NO | 1.173051197  |
| TCGA-CU-A72E | High Grade | Stage IV  | T3b    | M0 | N2 | 2.11638503   |
| TCGA-DK-A1A3 | High Grade | Stage IV  | T3     | M0 | N2 | 1.085386267  |
| TCGA-DK-A1A5 | High Grade | Stage II  | T2b    | M0 | NO | 1.201380131  |
| TCGA-DK-A1A6 | High Grade | Stage IV  | T2a    | M0 | N1 | 0.670788134  |
| TCGA-DK-A1A7 | High Grade | Stage IV  | T3     | M0 | N2 | 0.84351944   |
| TCGA-DK-A1AA | High Grade | Stage III | T3     | M0 | NO | 0.80737665   |
| TCGA-DK-A1AB | High Grade | Stage IV  | T4a    | M0 | N2 | 1.082053776  |
| TCGA-DK-A1AC | High Grade | Stage III | T3b    | M0 | NO | 0.838568509  |
| TCGA-DK-A1AD | High Grade | Stage IV  | T3b    | M0 | N2 | 0.702156222  |
| TCGA-DK-A1AE | High Grade | Stage III | T3     | M0 | NO | 0.703502329  |
| TCGA-DK-A1AF | High Grade | Stage IV  | T3     | M0 | N2 | 1.298542818  |

## Hazard infiltrating immune cells in bladder urothelial carcinoma

|              |            |           |        |    |    |             |
|--------------|------------|-----------|--------|----|----|-------------|
| TCGA-DK-A1AG | High Grade | Stage III | T3     | M0 | N0 | 1.062643607 |
| TCGA-DK-A2HX | High Grade | Stage IV  | T3     | M0 | N2 | 1.379933744 |
| TCGA-DK-A2I1 | High Grade | Stage II  | T2b    | M0 | N0 | 0.926462747 |
| TCGA-DK-A2I2 | High Grade | Stage IV  | T3     | M0 | N3 | 1.139747961 |
| TCGA-DK-A2I4 | High Grade | Stage III | T3b    | M0 | N0 | 0.760550789 |
| TCGA-DK-A2I6 | High Grade | Stage IV  | T2b    | M0 | N1 | 0.861164603 |
| TCGA-DK-A3IK | High Grade | Stage IV  | T3     | M0 | N2 | 1.038248818 |
| TCGA-DK-A3IL | High Grade | Stage IV  | T3     | M0 | N2 | 1.152782105 |
| TCGA-DK-A3IM | High Grade | Stage III | T3     | M0 | N0 | 1.600101863 |
| TCGA-DK-A3IN | High Grade | Stage III | T4a    | M0 | N0 | 1.246632921 |
| TCGA-DK-A3IQ | High Grade | Stage III | T3     | M0 | N0 | 1.567843006 |
| TCGA-DK-A3IS | High Grade | Stage II  | T2a    | M0 | N0 | 0.579337969 |
| TCGA-DK-A3IT | High Grade | Stage III | T3     | M0 | N0 | 1.131473447 |
| TCGA-DK-A3IU | High Grade | Stage II  | T2b    | M0 | N0 | 0.802711364 |
| TCGA-DK-A3IV | High Grade | Stage II  | unknow | M0 | NX | 1.015131618 |
| TCGA-DK-A3WW | High Grade | Stage III | T3     | M0 | N0 | 0.459724908 |
| TCGA-DK-A3WX | High Grade | Stage III | T3     | M0 | N0 | 0.961354643 |
| TCGA-DK-A3WY | High Grade | Stage III | T3     | M0 | N0 | 0.833666469 |
| TCGA-DK-A3X1 | High Grade | Stage III | T3     | M0 | N0 | 1.202480945 |
| TCGA-DK-A3X2 | High Grade | Stage IV  | T3     | M0 | N2 | 1.063841917 |
| TCGA-DK-A6AV | High Grade | Stage II  | T2a    | M0 | N0 | 0.838596727 |
| TCGA-DK-A6AW | High Grade | Stage II  | T2a    | M0 | N0 | 0.935804624 |
| TCGA-DK-A6B0 | High Grade | Stage II  | T2b    | M0 | N0 | 1.162264686 |
| TCGA-DK-A6B1 | High Grade | Stage II  | T2a    | M0 | N0 | 0.889151481 |
| TCGA-DK-A6B2 | High Grade | Stage IV  | T3     | M0 | N1 | 1.134015804 |
| TCGA-DK-A6B5 | High Grade | Stage IV  | T4a    | M0 | N2 | 0.96780704  |
| TCGA-DK-A6B6 | High Grade | Stage II  | unknow | MX | NX | 0.778800089 |
| TCGA-DK-AA6L | High Grade | Stage IV  | T3     | MX | N1 | 0.785610086 |
| TCGA-DK-AA6M | High Grade | Stage II  | T2     | M0 | N0 | 0.759543008 |
| TCGA-DK-AA6P | High Grade | Stage II  | unknow | M0 | N0 | 1.181616044 |
| TCGA-DK-AA6Q | High Grade | Stage IV  | T3     | M0 | N1 | 0.389334774 |
| TCGA-DK-AA6R | High Grade | Stage IV  | T4     | M0 | N1 | 0.800434214 |
| TCGA-DK-AA6S | High Grade | Stage III | T3b    | M0 | N0 | 0.913001405 |
| TCGA-DK-AA6T | High Grade | Stage II  | unknow | M0 | N0 | 0.78641976  |
| TCGA-DK-AA6U | unknow     | Stage II  | unknow | M0 | N0 | 0.706216794 |
| TCGA-DK-AA6W | High Grade | Stage II  | T2     | M0 | N0 | 0.723737718 |
| TCGA-DK-AA6X | High Grade | Stage II  | unknow | M0 | N0 | 0.714034746 |
| TCGA-DK-AA71 | High Grade | Stage II  | T2b    | M0 | N0 | 1.048639911 |
| TCGA-DK-AA74 | High Grade | Stage III | T3     | M0 | N0 | 1.009571244 |
| TCGA-DK-AA75 | High Grade | Stage III | T3     | M0 | N0 | 0.846130565 |
| TCGA-DK-AA76 | High Grade | Stage II  | unknow | M0 | N0 | 1.519830855 |
| TCGA-DK-AA77 | High Grade | Stage II  | T2a    | M0 | N0 | 0.615220128 |
| TCGA-E5-A2PC | High Grade | Stage IV  | T2b    | MX | N1 | 0.724294941 |
| TCGA-E5-A4TZ | High Grade | Stage IV  | T4b    | MX | N2 | 1.741408241 |
| TCGA-E5-A4U1 | High Grade | Stage II  | T2b    | M0 | N0 | 0.718499916 |
| TCGA-E7-A3X6 | Low Grade  | Stage II  | T2     | M0 | NX | 0.624444174 |
| TCGA-E7-A3Y1 | Low Grade  | Stage II  | unknow | M0 | N0 | 0.835411318 |
| TCGA-E7-A4IJ | High Grade | Stage II  | T2b    | M0 | NX | 0.651530087 |
| TCGA-E7-A4XJ | High Grade | Stage II  | T2     | M0 | N0 | 0.678840942 |

## Hazard infiltrating immune cells in bladder urothelial carcinoma

|              |            |           |     |    |    |             |
|--------------|------------|-----------|-----|----|----|-------------|
| TCGA-E7-A519 | High Grade | Stage II  | T2b | M0 | NX | 1.204851555 |
| TCGA-E7-A541 | High Grade | Stage II  | T2b | MX | N0 | 0.440074744 |
| TCGA-E7-A5KE | High Grade | Stage II  | T2a | M0 | N0 | 1.005201629 |
| TCGA-E7-A5KF | Low Grade  | Stage II  | T2a | M0 | N0 | 1.248259676 |
| TCGA-E7-A677 | Low Grade  | Stage II  | T2b | M0 | N0 | 0.644464918 |
| TCGA-E7-A678 | Low Grade  | Stage III | T3  | M0 | N0 | 0.844135317 |
| TCGA-E7-A6MD | High Grade | Stage IV  | T4a | M0 | N1 | 0.90425732  |
| TCGA-E7-A6ME | High Grade | Stage II  | T2b | M0 | NX | 0.633076844 |
| TCGA-E7-A6MF | Low Grade  | Stage II  | T2a | M0 | NX | 0.849166598 |
| TCGA-E7-A7DU | Low Grade  | Stage III | T3  | M0 | N0 | 1.190603517 |
| TCGA-E7-A7DV | High Grade | Stage IV  | T4  | MX | N3 | 1.934552457 |
| TCGA-E7-A7PW | High Grade | Stage III | T3a | M0 | NX | 0.771003011 |
| TCGA-E7-A7XN | High Grade | Stage III | T3  | M0 | N0 | 0.385967856 |
| TCGA-E7-A85H | High Grade | Stage III | T3  | M0 | N0 | 0.650632178 |
| TCGA-E7-A807 | Low Grade  | Stage II  | T2  | M0 | N0 | 0.722357281 |
| TCGA-E7-A808 | High Grade | Stage II  | T2  | M0 | N0 | 1.202789494 |
| TCGA-E7-A97P | High Grade | Stage II  | T2  | M0 | NX | 0.395550784 |
| TCGA-E7-A97Q | High Grade | Stage IV  | T4a | MX | N3 | 0.964801599 |
| TCGA-FD-A3B3 | High Grade | Stage III | T3  | MX | N0 | 0.874463168 |
| TCGA-FD-A3B4 | High Grade | Stage III | T4a | MX | N0 | 1.088979264 |
| TCGA-FD-A3B5 | High Grade | Stage IV  | T2b | MX | N1 | 1.398041959 |
| TCGA-FD-A3B6 | High Grade | Stage II  | T2b | MX | N0 | 0.839809845 |
| TCGA-FD-A3B7 | High Grade | Stage III | T3a | MX | N0 | 0.728688859 |
| TCGA-FD-A3B8 | High Grade | Stage II  | T2b | MX | N0 | 0.94834159  |
| TCGA-FD-A3N5 | High Grade | Stage II  | T2b | MX | N0 | 1.196215155 |
| TCGA-FD-A3N6 | High Grade | Stage II  | T2b | MX | N0 | 1.078138115 |
| TCGA-FD-A3NA | High Grade | Stage II  | T2b | MX | N0 | 0.727488188 |
| TCGA-FD-A3SJ | High Grade | Stage IV  | T2b | MX | N2 | 1.245523715 |
| TCGA-FD-A3SL | High Grade | Stage IV  | T4a | M1 | N2 | 1.509185607 |
| TCGA-FD-A3SM | High Grade | Stage IV  | T3a | M1 | N2 | 1.822766355 |
| TCGA-FD-A3SN | High Grade | Stage III | T3b | MX | N0 | 1.25718352  |
| TCGA-FD-A3SO | High Grade | Stage IV  | T3a | MX | N1 | 1.129797679 |
| TCGA-FD-A3SP | High Grade | Stage III | T3b | MX | N0 | 1.705977005 |
| TCGA-FD-A3SQ | High Grade | Stage IV  | T3a | MX | N2 | 1.454944065 |
| TCGA-FD-A3SR | High Grade | Stage IV  | T4a | MX | N2 | 0.96798127  |
| TCGA-FD-A3SS | High Grade | Stage IV  | T4  | MX | N3 | 0.944311561 |
| TCGA-FD-A43N | High Grade | Stage III | T3a | MX | N0 | 1.279218166 |
| TCGA-FD-A43P | High Grade | Stage II  | T2a | MX | N0 | 0.632010536 |
| TCGA-FD-A43S | High Grade | Stage III | T3b | MX | N0 | 0.767262195 |
| TCGA-FD-A43U | High Grade | Stage IV  | T4a | MX | N2 | 1.46915181  |
| TCGA-FD-A43X | High Grade | Stage II  | T2a | MX | N0 | 1.217242477 |
| TCGA-FD-A43Y | High Grade | Stage III | T4  | MX | N0 | 0.963919452 |
| TCGA-FD-A5BR | High Grade | Stage II  | T2b | MX | N0 | 1.005580667 |
| TCGA-FD-A5BS | High Grade | Stage III | T3b | MX | N0 | 0.757793548 |
| TCGA-FD-A5BT | High Grade | Stage III | T3b | MX | N0 | 0.893479367 |
| TCGA-FD-A5BU | High Grade | Stage II  | T2b | MX | N0 | 1.008039593 |
| TCGA-FD-A5BV | High Grade | Stage III | T3b | MX | N0 | 1.436191942 |
| TCGA-FD-A5BX | High Grade | Stage IV  | T3b | MX | N1 | 1.85205457  |
| TCGA-FD-A5BY | High Grade | Stage III | T3a | MX | N0 | 1.309029323 |

## Hazard infiltrating immune cells in bladder urothelial carcinoma

|              |            |           |        |        |        |             |
|--------------|------------|-----------|--------|--------|--------|-------------|
| TCGA-FD-A5BZ | High Grade | Stage IV  | T3a    | MX     | N1     | 1.755128687 |
| TCGA-FD-A5C0 | High Grade | Stage IV  | T3a    | MX     | N2     | 1.095891959 |
| TCGA-FD-A5C1 | High Grade | Stage III | T3b    | MX     | NO     | 1.021713519 |
| TCGA-FD-A62N | High Grade | Stage III | T3b    | MX     | NO     | 0.642769829 |
| TCGA-FD-A62O | High Grade | Stage IV  | T3a    | MX     | N2     | 1.259869825 |
| TCGA-FD-A62P | High Grade | Stage II  | T2b    | MX     | NO     | 0.998562176 |
| TCGA-FD-A62S | High Grade | Stage III | T3b    | MX     | NO     | 1.224095677 |
| TCGA-FD-A6TA | High Grade | Stage IV  | T3b    | MX     | N2     | 1.08666674  |
| TCGA-FD-A6TB | High Grade | Stage III | T3a    | MX     | NO     | 0.87264177  |
| TCGA-FD-A6TC | High Grade | Stage III | T4a    | MX     | NO     | 1.741596667 |
| TCGA-FD-A6TD | High Grade | Stage III | T3a    | MX     | NO     | 1.338663257 |
| TCGA-FD-A6TE | High Grade | Stage IV  | T3a    | MX     | N2     | 0.891693941 |
| TCGA-FD-A6TF | High Grade | Stage IV  | T3b    | M1     | N2     | 1.313198879 |
| TCGA-FD-A6TG | High Grade | Stage IV  | T3a    | MX     | N2     | 1.152881999 |
| TCGA-FD-A6TH | High Grade | Stage IV  | T3     | MX     | N2     | 1.644298057 |
| TCGA-FD-A6TI | High Grade | Stage IV  | T4b    | MX     | N1     | 0.930193562 |
| TCGA-FD-A6TK | High Grade | Stage III | T3a    | MX     | NO     | 0.808269566 |
| TCGA-FJ-A3Z7 | High Grade | Stage IV  | T4a    | MX     | N2     | 0.903249141 |
| TCGA-FJ-A3Z9 | High Grade | unknow    | TX     | MO     | NO     | 1.183134147 |
| TCGA-FJ-A3ZE | High Grade | Stage IV  | unknow | M1     | N3     | 1.012859176 |
| TCGA-FJ-A3ZF | High Grade | Stage III | unknow | MO     | NO     | 0.879719556 |
| TCGA-FJ-A871 | High Grade | Stage III | T3b    | MX     | NX     | 0.776577887 |
| TCGA-FT-A3EE | High Grade | Stage III | T4a    | MX     | NO     | 1.099587812 |
| TCGA-FT-A61P | High Grade | Stage IV  | T3b    | MX     | N2     | 1.438958799 |
| TCGA-G2-A2EC | High Grade | Stage II  | unknow | MO     | NO     | 0.907465302 |
| TCGA-G2-A2EF | High Grade | Stage II  | unknow | MO     | NO     | 0.58754059  |
| TCGA-G2-A2EJ | High Grade | Stage II  | unknow | MO     | NO     | 1.301422809 |
| TCGA-G2-A2EK | High Grade | Stage II  | unknow | MO     | NO     | 0.928467318 |
| TCGA-G2-A2EL | High Grade | Stage II  | unknow | MO     | NO     | 0.824410069 |
| TCGA-G2-A2EO | High Grade | Stage III | T3a    | MO     | NO     | 0.663275705 |
| TCGA-G2-A2ES | High Grade | Stage II  | T3b    | MO     | NO     | 1.080248652 |
| TCGA-G2-A3IB | High Grade | Stage II  | unknow | MX     | NX     | 1.509557616 |
| TCGA-G2-A3IE | High Grade | Stage II  | unknow | MX     | NX     | 1.249271111 |
| TCGA-G2-A3VY | High Grade | Stage II  | unknow | unknow | unknow | 0.713778807 |
| TCGA-G2-AA3B | High Grade | Stage II  | T2     | MO     | NO     | 0.547403516 |
| TCGA-G2-AA3C | High Grade | Stage IV  | T3b    | MO     | N1     | 1.827791884 |
| TCGA-G2-AA3D | High Grade | Stage IV  | T3     | MO     | N2     | 0.90097348  |
| TCGA-G2-AA3F | High Grade | Stage IV  | T3     | MO     | N1     | 1.507839512 |
| TCGA-GC-A3BM | High Grade | Stage II  | T2b    | MO     | NO     | 0.715975632 |
| TCGA-GC-A3I6 | High Grade | Stage III | T3a    | MO     | NO     | 1.242766416 |
| TCGA-GC-A300 | High Grade | Stage II  | T2b    | MO     | NO     | 1.881259668 |
| TCGA-GC-A3RB | High Grade | Stage III | T3b    | MO     | NO     | 0.61769371  |
| TCGA-GC-A3RC | High Grade | Stage II  | T2b    | MO     | NO     | 1.726686597 |
| TCGA-GC-A3RD | High Grade | Stage III | T3a    | MO     | NO     | 1.812135759 |
| TCGA-GC-A3WC | High Grade | Stage III | T3     | MX     | NO     | 0.699160685 |
| TCGA-GC-A3YS | High Grade | Stage IV  | T3a    | MX     | N1     | 1.390753987 |
| TCGA-GC-A4ZW | High Grade | Stage III | T3a    | MO     | NO     | 0.750718772 |
| TCGA-GC-A6I1 | High Grade | Stage II  | T2b    | MX     | NO     | 1.118946029 |
| TCGA-GC-A6I3 | High Grade | Stage IV  | T3a    | MX     | N1     | 0.986437809 |
| TCGA-GD-A2C5 | High Grade | Stage IV  | T3a    | MX     | N2     | 1.106636506 |

## Hazard infiltrating immune cells in bladder urothelial carcinoma

|              |            |           |        |    |    |             |
|--------------|------------|-----------|--------|----|----|-------------|
| TCGA-GD-A30P | High Grade | Stage IV  | T4a    | MX | N2 | 0.838714133 |
| TCGA-GD-A30Q | High Grade | Stage IV  | T4a    | MX | N1 | 1.408783835 |
| TCGA-GD-A30S | High Grade | Stage II  | unknow | MX | NX | 1.503834564 |
| TCGA-GD-A6C6 | High Grade | Stage III | T3a    | MX | N0 | 1.869833664 |
| TCGA-GD-A76B | High Grade | Stage II  | T2b    | MX | N0 | 0.693656916 |
| TCGA-GU-A42P | High Grade | Stage IV  | T3a    | MO | N1 | 1.106444097 |
| TCGA-GU-A42Q | High Grade | Stage III | T3b    | MO | N0 | 1.199746734 |
| TCGA-GU-A42R | High Grade | Stage IV  | T4a    | MX | N2 | 0.990280721 |
| TCGA-GU-A762 | High Grade | Stage IV  | T4a    | MX | N2 | 0.615278909 |
| TCGA-GU-A763 | High Grade | Stage III | T4     | MO | N0 | 0.685010239 |
| TCGA-GU-A764 | High Grade | Stage II  | T2b    | MX | N0 | 0.898128998 |
| TCGA-GU-A766 | High Grade | Stage II  | T2a    | MX | N0 | 0.587182492 |
| TCGA-GU-A767 | High Grade | Stage IV  | T3b    | MX | N2 | 1.059341377 |
| TCGA-GU-AATO | High Grade | Stage IV  | T4a    | MX | N2 | 0.915643036 |
| TCGA-GU-AATP | High Grade | Stage IV  | T2     | MX | N2 | 1.686033888 |
| TCGA-GU-AATQ | High Grade | Stage III | T3b    | MX | N0 | 1.562223742 |
| TCGA-GV-A3JV | High Grade | Stage IV  | T3b    | MX | N1 | 0.695989382 |
| TCGA-GV-A3JW | High Grade | Stage II  | T2     | MX | NX | 1.268146203 |
| TCGA-GV-A3JX | High Grade | Stage III | T3b    | MX | N0 | 0.936105905 |
| TCGA-GV-A3JZ | High Grade | Stage IV  | T4a    | MX | N3 | 1.252424571 |
| TCGA-GV-A3QF | High Grade | Stage IV  | T3b    | MX | N2 | 1.077134768 |
| TCGA-GV-A3QG | High Grade | Stage IV  | T3a    | MX | N3 | 1.015234928 |
| TCGA-GV-A3QH | High Grade | Stage II  | unknow | MX | NX | 1.407477985 |
| TCGA-GV-A3QI | High Grade | Stage III | T3b    | MX | N0 | 1.358743827 |
| TCGA-GV-A3QK | High Grade | Stage IV  | T4a    | MO | N2 | 0.726598883 |
| TCGA-GV-A40E | High Grade | Stage II  | unknow | MX | NX | 1.011824494 |
| TCGA-GV-A40G | High Grade | Stage II  | T2a    | MX | N0 | 0.978603261 |
| TCGA-GV-A6ZA | High Grade | Stage II  | T2b    | MX | N0 | 0.711659964 |
| TCGA-H4-A2HO | High Grade | Stage III | T4a    | MX | N0 | 1.118448825 |
| TCGA-H4-A2HQ | High Grade | Stage IV  | unknow | M1 | NX | 0.814412843 |
| TCGA-HQ-A20E | unknow     | unknow    | T2a    | MX | N2 | 0.597573718 |
| TCGA-HQ-A20F | High Grade | Stage III | T3b    | MO | N0 | 0.894051272 |
| TCGA-HQ-A5ND | High Grade | Stage IV  | T3b    | MO | N1 | 0.659371172 |
| TCGA-HQ-A5NE | High Grade | Stage III | T3     | MO | N0 | 1.363093809 |
| TCGA-K4-A3WS | High Grade | Stage III | T3a    | MX | N0 | 0.958902751 |
| TCGA-K4-A3WU | High Grade | Stage III | T4a    | MX | N0 | 0.97294953  |
| TCGA-K4-A3WV | High Grade | Stage II  | T2b    | MX | N0 | 1.161825872 |
| TCGA-K4-A4AB | High Grade | Stage III | T4a    | MX | N0 | 0.952780664 |
| TCGA-K4-A4AC | High Grade | Stage II  | T2b    | MX | N0 | 1.406488567 |
| TCGA-K4-A54R | High Grade | Stage II  | T2b    | MX | N0 | 0.674971527 |
| TCGA-K4-A5RH | High Grade | Stage III | T3a    | MX | N0 | 0.493961984 |
| TCGA-K4-A5RI | High Grade | Stage III | T3a    | MX | N0 | 0.756091417 |
| TCGA-K4-A5RJ | High Grade | Stage II  | T2b    | MX | N0 | 0.69032809  |
| TCGA-K4-A6FZ | High Grade | Stage III | T3a    | MX | N0 | 1.24479469  |
| TCGA-K4-A6MB | High Grade | Stage IV  | T3b    | MX | N1 | 2.316122838 |
| TCGA-K4-A83P | unknow     | Stage IV  | T4a    | MX | N1 | 0.955394184 |
| TCGA-K4-AAQO | High Grade | Stage III | T3a    | MX | N0 | 1.017955888 |
| TCGA-KQ-A41N | High Grade | Stage III | T3b    | MO | N0 | 1.191933021 |
| TCGA-KQ-A41O | High Grade | Stage IV  | T3     | MO | N1 | 0.475145799 |

## Hazard infiltrating immune cells in bladder urothelial carcinoma

|              |            |           |        |    |    |             |
|--------------|------------|-----------|--------|----|----|-------------|
| TCGA-KQ-A41P | High Grade | Stage IV  | T3b    | M1 | N3 | 2.619136186 |
| TCGA-KQ-A41Q | High Grade | Stage III | T3b    | MX | N0 | 1.411536582 |
| TCGA-KQ-A41R | High Grade | Stage II  | T2     | MX | N0 | 1.563756224 |
| TCGA-KQ-A41S | High Grade | Stage III | T4a    | MX | NX | 1.467644033 |
| TCGA-LC-A66R | High Grade | Stage IV  | T4a    | MX | N2 | 0.792883134 |
| TCGA-LT-A5Z6 | High Grade | Stage II  | unknow | MX | NX | 0.907603741 |
| TCGA-LT-A8JT | High Grade | Stage II  | T2a    | M0 | N0 | 0.765026867 |
| TCGA-MV-A51V | High Grade | Stage III | T3a    | M0 | N0 | 1.061919807 |
| TCGA-PQ-A6FI | High Grade | Stage II  | T2a    | MX | N0 | 0.847797336 |
| TCGA-PQ-A6FN | High Grade | Stage III | T3a    | MX | N0 | 1.32148547  |
| TCGA-R3-A69X | High Grade | Stage III | T3a    | M0 | N0 | 0.85455038  |
| TCGA-S5-A6DX | High Grade | Stage IV  | T4a    | MX | N2 | 1.014034227 |
| TCGA-S5-AA26 | High Grade | Stage III | T3a    | MX | N0 | 1.235182271 |
| TCGA-SY-A9G0 | High Grade | Stage IV  | T4     | M0 | N1 | 1.182721861 |
| TCGA-SY-A9G5 | High Grade | Stage III | T4a    | M0 | N0 | 1.081389756 |
| TCGA-UY-A78K | High Grade | Stage IV  | unknow | MX | N2 | 0.961848133 |
| TCGA-UY-A78L | High Grade | Stage IV  | unknow | MX | N1 | 1.735641345 |
| TCGA-UY-A78M | High Grade | Stage IV  | T2     | MX | N2 | 1.559880122 |
| TCGA-UY-A78N | High Grade | Stage IV  | T2     | MX | N1 | 0.791391029 |
| TCGA-UY-A78O | High Grade | Stage II  | T2     | MX | N0 | 1.312061023 |
| TCGA-UY-A78P | High Grade | Stage II  | T2     | MX | N0 | 1.544931628 |
| TCGA-UY-A80B | High Grade | Stage IV  | T3a    | MX | N1 | 0.666020158 |
| TCGA-UY-A80C | High Grade | Stage IV  | T4     | MX | N1 | 2.072535324 |
| TCGA-UY-A80D | High Grade | Stage II  | T2b    | MX | N0 | 1.311412354 |
| TCGA-UY-A9PA | High Grade | Stage III | T3a    | MX | N0 | 0.676893736 |
| TCGA-UY-A9PB | High Grade | Stage III | T3a    | MX | N0 | 1.010131217 |
| TCGA-UY-A9PD | High Grade | Stage III | T3a    | MX | N0 | 1.620069459 |
| TCGA-UY-A9PE | High Grade | Stage IV  | T2b    | MX | N2 | 1.306549592 |
| TCGA-UY-A9PF | High Grade | Stage IV  | T3a    | MX | N2 | 0.96734319  |
| TCGA-UY-A9PH | High Grade | Stage II  | T2b    | MX | N0 | 0.783951422 |
| TCGA-XF-A8HB | High Grade | Stage II  | T2b    | MX | N0 | 1.274536701 |
| TCGA-XF-A8HC | High Grade | Stage IV  | T3a    | MX | N2 | 1.221966404 |
| TCGA-XF-A8HD | High Grade | Stage III | T3a    | MX | N0 | 0.621032344 |
| TCGA-XF-A8HE | High Grade | Stage III | T3b    | MX | N0 | 0.726366312 |
| TCGA-XF-A8HF | High Grade | Stage III | T3a    | M0 | N0 | 1.467242221 |
| TCGA-XF-A8HG | High Grade | Stage III | T3b    | MX | N0 | 1.09674257  |
| TCGA-XF-A8HH | High Grade | Stage IV  | T3b    | M0 | N2 | 1.328158025 |
| TCGA-XF-A8HI | High Grade | Stage IV  | T2b    | MX | N2 | 0.980630975 |
| TCGA-XF-A9SH | High Grade | Stage II  | T2b    | M0 | N0 | 1.162833233 |
| TCGA-XF-A9SI | High Grade | Stage II  | T2b    | MX | N0 | 0.613459032 |
| TCGA-XF-A9SJ | High Grade | Stage IV  | T3b    | MX | N2 | 0.798876693 |
| TCGA-XF-A9SK | High Grade | Stage IV  | T3b    | MX | N1 | 1.135907142 |
| TCGA-XF-A9SL | High Grade | Stage IV  | T3a    | MX | N2 | 0.920334881 |
| TCGA-XF-A9SM | High Grade | Stage III | T3b    | MX | N0 | 0.739135402 |
| TCGA-XF-A9SP | High Grade | Stage III | T3b    | MX | N0 | 1.123826159 |
| TCGA-XF-A9ST | High Grade | Stage III | T3b    | MX | N0 | 1.098052279 |
| TCGA-XF-A9SU | High Grade | Stage IV  | T3b    | MX | N1 | 1.126319807 |
| TCGA-XF-A9SV | High Grade | Stage IV  | T4a    | M1 | N2 | 1.917543259 |
| TCGA-XF-A9SW | High Grade | Stage IV  | T3b    | MX | N2 | 1.524534485 |

## Hazard infiltrating immune cells in bladder urothelial carcinoma

|              |            |           |        |        |        |             |
|--------------|------------|-----------|--------|--------|--------|-------------|
| TCGA-XF-A9SX | High Grade | Stage IV  | T3b    | MX     | N2     | 1.058807283 |
| TCGA-XF-A9SY | High Grade | Stage IV  | T3b    | MX     | N2     | 1.135546594 |
| TCGA-XF-A9SZ | High Grade | Stage IV  | T3b    | MX     | N2     | 2.22660383  |
| TCGA-XF-A9T0 | High Grade | Stage III | T3b    | MX     | N0     | 1.056622031 |
| TCGA-XF-A9T2 | High Grade | Stage III | T3b    | MX     | N0     | 1.755874823 |
| TCGA-XF-A9T3 | High Grade | Stage IV  | T3b    | MX     | N2     | 1.506401754 |
| TCGA-XF-A9T4 | High Grade | Stage IV  | T2b    | MX     | N1     | 0.999906518 |
| TCGA-XF-A9T5 | High Grade | Stage IV  | T3a    | MX     | N1     | 0.705576606 |
| TCGA-XF-A9T6 | High Grade | Stage III | T3b    | MX     | N0     | 1.158525835 |
| TCGA-XF-A9T8 | High Grade | Stage III | T3b    | MX     | N0     | 0.854784264 |
| TCGA-XF-AAME | High Grade | Stage II  | T2b    | MX     | N0     | 1.360455702 |
| TCGA-XF-AAMG | High Grade | Stage III | T4a    | MX     | N0     | 1.569581878 |
| TCGA-XF-AAMH | High Grade | Stage IV  | T3b    | MX     | N1     | 1.255741481 |
| TCGA-XF-AAMJ | High Grade | Stage III | T3b    | M0     | N0     | 1.31307036  |
| TCGA-XF-AAML | High Grade | Stage II  | T2b    | MX     | N0     | 0.608299673 |
| TCGA-XF-AAMQ | High Grade | Stage II  | T2a    | MX     | N0     | 0.934158679 |
| TCGA-XF-AAMR | High Grade | Stage III | T3b    | MX     | N0     | 1.358318356 |
| TCGA-XF-AAMT | High Grade | Stage IV  | T3b    | MX     | N2     | 2.218765796 |
| TCGA-XF-AAMW | High Grade | Stage IV  | T2b    | unknow | N0     | 1.172824504 |
| TCGA-XF-AAMX | High Grade | Stage III | T3b    | MX     | N0     | 1.782543669 |
| TCGA-XF-AAMY | High Grade | Stage III | T3b    | MX     | N0     | 1.78167895  |
| TCGA-XF-AAMZ | High Grade | Stage IV  | T3a    | MX     | N2     | 1.250240673 |
| TCGA-XF-AANO | High Grade | Stage IV  | T4a    | M0     | N2     | 0.885798205 |
| TCGA-XF-AAN1 | High Grade | Stage III | T4a    | M0     | N0     | 0.448902309 |
| TCGA-XF-AAN2 | High Grade | Stage II  | T2b    | MX     | N0     | 0.886458845 |
| TCGA-XF-AAN3 | High Grade | Stage IV  | T3b    | MX     | N2     | 0.860432569 |
| TCGA-XF-AAN4 | High Grade | Stage III | T3b    | MX     | N0     | 1.033693552 |
| TCGA-XF-AAN5 | High Grade | Stage III | T3b    | MX     | N0     | 0.792577285 |
| TCGA-XF-AAN7 | High Grade | Stage IV  | T3a    | MX     | N1     | 1.599068294 |
| TCGA-XF-AAN8 | High Grade | Stage III | T3b    | MX     | N0     | 1.425122564 |
| TCGA-YC-A89H | High Grade | Stage II  | unknow | MX     | unknow | 1.639017046 |
| TCGA-YC-A8S6 | High Grade | Stage II  | T2a    | MX     | N0     | 0.927276807 |
| TCGA-YC-A9TC | High Grade | Stage IV  | unknow | M1     | unknow | 1.227564153 |
| TCGA-YF-AA3L | High Grade | Stage II  | T2b    | MX     | N0     | 0.795565382 |
| TCGA-YF-AA3M | High Grade | Stage II  | T2a    | MX     | NX     | 1.166593454 |
| TCGA-ZF-A9R0 | High Grade | Stage III | T3b    | M0     | NX     | 1.085338807 |
| TCGA-ZF-A9R1 | High Grade | Stage IV  | T3b    | M0     | N1     | 0.920624087 |
| TCGA-ZF-A9R2 | High Grade | Stage II  | T2b    | M0     | N0     | 0.87947563  |
| TCGA-ZF-A9R3 | High Grade | Stage II  | T2     | M0     | NX     | 0.653086167 |
| TCGA-ZF-A9R4 | High Grade | Stage II  | T2     | M0     | NX     | 0.747147841 |
| TCGA-ZF-A9R5 | High Grade | Stage III | T3     | M0     | N0     | 0.760913823 |
| TCGA-ZF-A9R7 | High Grade | Stage II  | unknow | M0     | NX     | 0.462957881 |
| TCGA-ZF-A9R9 | High Grade | Stage IV  | T3b    | MX     | N2     | 1.143688686 |
| TCGA-ZF-A9RC | High Grade | Stage III | T3a    | MX     | N0     | 1.532364675 |
| TCGA-ZF-A9RD | High Grade | Stage IV  | T3a    | MX     | N2     | 0.722850348 |
| TCGA-ZF-A9RE | High Grade | Stage II  | unknow | MX     | unknow | 0.933158116 |
| TCGA-ZF-A9RF | High Grade | Stage II  | T1     | M0     | NX     | 0.622829224 |
| TCGA-ZF-A9RL | High Grade | Stage II  | unknow | MX     | unknow | 0.492544953 |
| TCGA-ZF-A9RM | High Grade | Stage II  | T0     | MX     | N0     | 0.824019602 |



## Hazard infiltrating immune cells in bladder urothelial carcinoma

|              |            |           |        |        |        |             |
|--------------|------------|-----------|--------|--------|--------|-------------|
| TCGA-ZF-A9RN | High Grade | Stage III | T3b    | M0     | NX     | 0.553121931 |
| TCGA-ZF-AA4N | High Grade | Stage II  | unknow | unknow | unknow | 0.532726758 |
| TCGA-ZF-AA4R | High Grade | Stage IV  | T3a    | MX     | N1     | 1.44205472  |
| TCGA-ZF-AA4T | High Grade | Stage IV  | T4     | MX     | N2     | 1.272606743 |
| TCGA-ZF-AA4U | High Grade | Stage III | T4a    | MX     | NX     | 0.629454894 |
| TCGA-ZF-AA4V | High Grade | Stage III | T3b    | M0     | N0     | 0.70943908  |
| TCGA-ZF-AA4W | High Grade | Stage III | T3b    | MX     | N0     | 1.077334552 |
| TCGA-ZF-AA4X | High Grade | Stage II  | T2     | M0     | NX     | 1.081171073 |
| TCGA-ZF-AA51 | High Grade | Stage II  | T2     | M0     | NX     | 1.101289942 |
| TCGA-ZF-AA52 | High Grade | Stage III | T3a    | MX     | NX     | 1.759942408 |
| TCGA-ZF-AA53 | High Grade | Stage II  | T2     | M0     | NX     | 1.053384694 |
| TCGA-ZF-AA54 | High Grade | Stage III | T3     | MX     | NX     | 2.37311043  |
| TCGA-ZF-AA56 | High Grade | Stage III | T4a    | MX     | N0     | 1.039202586 |
| TCGA-ZF-AA58 | High Grade | Stage IV  | T3a    | MX     | N2     | 1.477814046 |
| TCGA-ZF-AA5H | High Grade | Stage IV  | T3b    | M0     | N2     | 1.289620157 |
| TCGA-ZF-AA5N | High Grade | Stage IV  | T2     | M1     | NX     | 1.010082031 |
| TCGA-ZF-AA5P | High Grade | Stage IV  | T2b    | M0     | N2     | 0.732294781 |

**Table S4.** Differentially expressed genes between high TIICs and low TIICs levels

| gene          | conMean     | treatMean   | logFC        | pValue   | FDR      |
|---------------|-------------|-------------|--------------|----------|----------|
| KLRK1         | 32.29593089 | 15.56723899 | -1.052839314 | 3.43E-12 | 4.29E-08 |
| RP5-907D15.4  | 18.99831074 | 41.40795535 | 1.124036822  | 3.36E-12 | 4.29E-08 |
| COL5A3        | 1103.436623 | 2277.066039 | 1.045172364  | 4.90E-11 | 2.69E-07 |
| LINC01561     | 8.206788473 | 20.19896124 | 1.299391428  | 5.37E-11 | 2.69E-07 |
| COL1A1        | 116635.661  | 264848.9818 | 1.183161007  | 1.10E-10 | 3.45E-07 |
| RP11-863P13.3 | 24.3341532  | 61.67945799 | 1.341807516  | 1.75E-10 | 4.72E-07 |
| TRAV19        | 14.32655382 | 6.89025777  | -1.056061757 | 1.88E-10 | 4.72E-07 |
| ADAMTS12      | 474.3262996 | 1129.665525 | 1.25194391   | 3.73E-10 | 7.18E-07 |
| SSC5D         | 426.9124064 | 924.5654147 | 1.114835308  | 5.66E-10 | 9.40E-07 |
| OLFML2B       | 1059.990556 | 2144.305005 | 1.016458717  | 6.00E-10 | 9.40E-07 |
| CD8A          | 802.4900871 | 254.1721513 | -1.658677603 | 6.64E-10 | 9.79E-07 |
| COL1A2        | 68375.63982 | 151753.763  | 1.150177958  | 7.71E-10 | 1.07E-06 |
| PLPP4         | 131.4300883 | 294.586665  | 1.164396536  | 8.57E-10 | 1.07E-06 |
| TRGC2         | 63.93936597 | 20.25124568 | -1.658693785 | 1.06E-09 | 1.27E-06 |
| MXRA8         | 2513.510805 | 5080.568618 | 1.015286081  | 1.14E-09 | 1.30E-06 |
| RP11-394I13.1 | 4.119454085 | 9.990277726 | 1.278071623  | 1.55E-09 | 1.50E-06 |
| AC092580.4    | 56.24211134 | 20.9779139  | -1.422779535 | 1.52E-09 | 1.50E-06 |
| P4HA3         | 170.1538612 | 353.4361184 | 1.05460959   | 1.93E-09 | 1.66E-06 |
| RP11-400N13.3 | 9.019124975 | 27.71194429 | 1.619448558  | 2.90E-09 | 1.79E-06 |
| TRGV10        | 10.57401326 | 3.664886321 | -1.528682687 | 2.59E-09 | 1.79E-06 |
| COL3A1        | 66408.85403 | 154121.3681 | 1.214619389  | 2.26E-09 | 1.79E-06 |
| RPLPOP2       | 118.5931049 | 259.6476289 | 1.130534918  | 2.89E-09 | 1.79E-06 |
| COL10A1       | 654.8048683 | 1807.923625 | 1.46519678   | 2.69E-09 | 1.79E-06 |
| CTD-2171N6.1  | 9.988971838 | 45.78115512 | 2.19634577   | 2.85E-09 | 1.79E-06 |
| POSTN         | 6764.077048 | 14983.54966 | 1.147414446  | 3.51E-09 | 2.09E-06 |
| MMP9          | 1432.237847 | 11158.99787 | 2.96186447   | 3.71E-09 | 2.16E-06 |
| ZNF469        | 368.9656911 | 808.0845354 | 1.131019553  | 4.13E-09 | 2.22E-06 |
| MMP8          | 3.207257991 | 9.600385433 | 1.581751919  | 4.42E-09 | 2.22E-06 |

## Hazard infiltrating immune cells in bladder urothelial carcinoma

|               |             |             |              |          |          |
|---------------|-------------|-------------|--------------|----------|----------|
| PCOLCE        | 2295.854539 | 4679.91945  | 1.02745246   | 4.37E-09 | 2.22E-06 |
| MMP11         | 5115.514815 | 12688.86495 | 1.31061168   | 4.88E-09 | 2.31E-06 |
| FASLG         | 61.94279933 | 22.35883866 | -1.470091328 | 6.84E-09 | 2.90E-06 |
| RP11-426C22.4 | 16.04008513 | 34.2838163  | 1.095845913  | 6.75E-09 | 2.90E-06 |
| FNDC1         | 638.2170105 | 1380.973298 | 1.113566458  | 7.12E-09 | 2.90E-06 |
| RP11-290012.2 | 2.461657973 | 5.625817251 | 1.192432364  | 7.19E-09 | 2.90E-06 |
| COL6A3        | 16799.58612 | 34760.23375 | 1.049012093  | 7.86E-09 | 3.08E-06 |
| ITGA11        | 814.113355  | 2255.520544 | 1.470158836  | 1.13E-08 | 4.10E-06 |
| THEMIS        | 68.87020467 | 28.16087902 | -1.290187597 | 1.30E-08 | 4.57E-06 |
| RP11-366L20.2 | 15.59782618 | 37.65763871 | 1.271597561  | 1.63E-08 | 5.52E-06 |
| ASPN          | 517.4808505 | 1440.542895 | 1.477035239  | 1.69E-08 | 5.64E-06 |
| CD3D          | 448.0191748 | 196.3428903 | -1.190185122 | 1.85E-08 | 6.03E-06 |
| TTC24         | 17.69579587 | 7.284749549 | -1.28045537  | 2.05E-08 | 6.49E-06 |
| AEBP1         | 9883.126567 | 19834.35197 | 1.004961841  | 2.08E-08 | 6.52E-06 |
| RP11-291B21.2 | 93.11495982 | 22.68943647 | -2.036992192 | 2.36E-08 | 7.20E-06 |
| SGCD          | 151.7796412 | 340.2482043 | 1.164609259  | 2.97E-08 | 8.60E-06 |
| SFRP2         | 3603.07909  | 9209.44311  | 1.3538836    | 2.96E-08 | 8.60E-06 |
| RP11-429E11.2 | 1.531435953 | 3.6940098   | 1.270302661  | 4.07E-08 | 1.06E-05 |
| GPR171        | 90.90879142 | 40.00907397 | -1.184092581 | 4.97E-08 | 1.23E-05 |
| GPR25         | 14.03748867 | 5.21923363  | -1.427374969 | 5.06E-08 | 1.24E-05 |
| CLEC11A       | 513.8637962 | 1096.243646 | 1.093110563  | 5.19E-08 | 1.25E-05 |
| LINC01614     | 35.52626212 | 93.62240817 | 1.397967971  | 5.49E-08 | 1.30E-05 |
| TRAV12-1      | 7.592845511 | 2.839784308 | -1.418859298 | 5.98E-08 | 1.35E-05 |
| SIRPG         | 201.2725569 | 76.58831229 | -1.393954325 | 6.34E-08 | 1.42E-05 |
| GZMH          | 284.6870218 | 81.91377169 | -1.797198796 | 6.88E-08 | 1.51E-05 |
| ADGRG5        | 162.4927559 | 65.67492802 | -1.306960783 | 7.31E-08 | 1.58E-05 |
| RP1-47M23.3   | 10.49201909 | 4.301958297 | -1.286226893 | 7.39E-08 | 1.58E-05 |
| NID2          | 445.401448  | 907.0150475 | 1.026020237  | 9.26E-08 | 1.81E-05 |
| KLRC1         | 73.10917682 | 20.50920684 | -1.833780809 | 9.44E-08 | 1.82E-05 |
| CD3G          | 182.6167066 | 82.61618202 | -1.144322461 | 1.45E-07 | 2.47E-05 |
| UBD           | 736.2640348 | 246.8009608 | -1.576875219 | 1.52E-07 | 2.53E-05 |
| BNC2          | 209.7139535 | 425.8661757 | 1.021977293  | 1.53E-07 | 2.53E-05 |
| ADGRF2        | 10.66512392 | 30.81285576 | 1.53063167   | 1.90E-07 | 3.09E-05 |
| ISLR          | 2317.875847 | 5431.82779  | 1.228634448  | 1.94E-07 | 3.14E-05 |
| TBX21         | 75.53591554 | 29.84094232 | -1.339869681 | 2.10E-07 | 3.35E-05 |
| FAM180A       | 23.96389903 | 58.90150238 | 1.297441773  | 2.14E-07 | 3.37E-05 |
| IFNG          | 56.68548541 | 14.14297392 | -2.002893858 | 2.18E-07 | 3.41E-05 |
| TRAT1         | 50.8565739  | 18.22224331 | -1.480733696 | 2.25E-07 | 3.47E-05 |
| FLJ16779      | 14.90151878 | 38.23763805 | 1.359534031  | 2.28E-07 | 3.49E-05 |
| KLRC4-KLRK1   | 6.885943995 | 3.378009455 | -1.027481081 | 2.28E-07 | 3.49E-05 |
| FAM69C        | 7.755327468 | 23.16496229 | 1.578684728  | 2.34E-07 | 3.53E-05 |
| LUM           | 10416.11364 | 20947.8185  | 1.007982916  | 2.41E-07 | 3.62E-05 |
| UNC5C         | 103.1888479 | 227.4415689 | 1.140208895  | 2.58E-07 | 3.68E-05 |
| RP4-598P13.1  | 1.547237825 | 4.551724219 | 1.55671818   | 2.59E-07 | 3.68E-05 |
| FIBIN         | 182.0286089 | 464.5127728 | 1.351553055  | 2.52E-07 | 3.68E-05 |
| ZNF683        | 232.1043518 | 63.9828018  | -1.859017498 | 2.51E-07 | 3.68E-05 |
| CAMK2A        | 20.21070305 | 41.44129258 | 1.035949494  | 2.62E-07 | 3.69E-05 |
| GPR1          | 53.56019324 | 145.9564143 | 1.446304543  | 2.87E-07 | 3.95E-05 |
| LRRC15        | 534.0061225 | 1241.744298 | 1.217439934  | 3.11E-07 | 4.19E-05 |

## Hazard infiltrating immune cells in bladder urothelial carcinoma

|               |             |             |              |          |             |
|---------------|-------------|-------------|--------------|----------|-------------|
| CTSK          | 2759.266808 | 6500.287204 | 1.236218498  | 3.14E-07 | 4.21E-05    |
| PRRG3         | 14.4870764  | 40.60704763 | 1.486963661  | 3.18E-07 | 4.23E-05    |
| RP11-893F2.6  | 0.78373929  | 1.733027911 | 1.144849162  | 3.21E-07 | 4.26E-05    |
| SCML4         | 59.17734511 | 25.76994061 | -1.199355761 | 3.34E-07 | 4.38E-05    |
| ADAMTS16      | 111.9881459 | 228.5702782 | 1.029291788  | 3.81E-07 | 4.75E-05    |
| TRBV27        | 4.730181132 | 1.735875591 | -1.446231875 | 3.86E-07 | 4.79E-05    |
| COL11A1       | 965.6033333 | 2809.145059 | 1.540628563  | 4.15E-07 | 5.00E-05    |
| CIITA         | 1695.976141 | 826.5330469 | -1.036971466 | 4.24E-07 | 5.09E-05    |
| TRDV1         | 9.157231905 | 2.018720197 | -2.181470598 | 4.99E-07 | 5.73E-05    |
| RP11-184M15.1 | 2.358725851 | 8.182811789 | 1.794588922  | 5.04E-07 | 5.77E-05    |
| KLHL4         | 24.72450938 | 59.23133769 | 1.260418775  | 5.40E-07 | 6.12E-05    |
| HS3ST2        | 36.42882585 | 78.83428829 | 1.113742758  | 5.64E-07 | 6.23E-05    |
| KLK4          | 35.1069741  | 101.30505   | 1.528876535  | 5.80E-07 | 6.34E-05    |
| CD2           | 694.883988  | 324.0992819 | -1.100336314 | 6.13E-07 | 6.56E-05    |
| MCHR1         | 18.14927729 | 37.01088382 | 1.028037487  | 6.37E-07 | 6.73E-05    |
| SLA2          | 179.2393765 | 80.1056057  | -1.161912504 | 6.35E-07 | 6.73E-05    |
| TSSC2         | 23.73008145 | 51.99499577 | 1.131655726  | 6.51E-07 | 6.83E-05    |
| TNN           | 27.40980415 | 170.1419839 | 2.633975257  | 6.71E-07 | 6.98E-05    |
| OBP2A         | 3.293382609 | 8.637736997 | 1.391083263  | 6.94E-07 | 7.12E-05    |
| HILS1         | 1.320924977 | 3.151618536 | 1.254544396  | 7.16E-07 | 7.15E-05    |
| CD3E          | 917.042454  | 405.9464278 | -1.175699175 | 7.16E-07 | 7.15E-05    |
| RPSAP52       | 19.58778261 | 49.46283896 | 1.336390957  | 7.50E-07 | 7.39E-05    |
| ZNF831        | 66.01141657 | 29.05053843 | -1.184150655 | 8.69E-07 | 8.31E-05    |
| AC112721.1    | 7.628346993 | 24.04686541 | 1.656406472  | 8.77E-07 | 8.31E-05    |
| RP11-13P5.2   | 6.010607827 | 12.32441353 | 1.035936199  | 8.79E-07 | 8.31E-05    |
| RP11-417E7.2  | 16.95527358 | 34.71222584 | 1.033709815  | 9.46E-07 | 8.84E-05    |
| KLRC4         | 3.741373627 | 1.686132519 | -1.149850119 | 9.74E-07 | 9.01E-05    |
| TM4SF19       | 57.95204343 | 128.8637456 | 1.152914997  | 1.01E-06 | 9.20E-05    |
| UBASH3A       | 90.37645268 | 41.14305887 | -1.135297873 | 1.02E-06 | 9.21E-05    |
| CHI3L1        | 2199.549175 | 7891.36789  | 1.843067543  | 1.04E-06 | 9.27E-05    |
| DIRC1         | 3.443847402 | 7.480459101 | 1.119105598  | 1.06E-06 | 9.31E-05    |
| PRND          | 13.88009299 | 67.73959351 | 2.286982096  | 1.06E-06 | 9.31E-05    |
| CXCR2P1       | 111.9852047 | 41.58018965 | -1.429339894 | 1.32E-06 | 0.000108355 |
| KIR2DL4       | 51.52091684 | 18.20838173 | -1.500555559 | 1.32E-06 | 0.000108393 |
| CSDC2         | 124.6258342 | 264.907375  | 1.087884847  | 1.33E-06 | 0.000108562 |
| ATP6V0D2      | 18.53150563 | 71.80065381 | 1.95401688   | 1.34E-06 | 0.000109124 |
| IL36RN        | 125.8206148 | 419.2238974 | 1.736352642  | 1.44E-06 | 0.000114847 |
| OR2I1P        | 511.5906276 | 149.897202  | -1.77101638  | 2.05E-06 | 0.000154214 |
| IGFL3         | 11.263452   | 28.65134763 | 1.346953948  | 2.12E-06 | 0.000157033 |
| RP11-35609.2  | 58.60751196 | 28.66435376 | -1.031827839 | 2.42E-06 | 0.00017235  |
| TRIML2        | 25.78885412 | 57.75101935 | 1.16309874   | 2.43E-06 | 0.000172956 |
| TRBV4-1       | 8.805433288 | 3.114088019 | -1.499584274 | 2.59E-06 | 0.000180319 |
| LCK           | 631.009647  | 308.1136576 | -1.034199428 | 2.67E-06 | 0.00018254  |
| SFRP4         | 2087.250529 | 4609.983158 | 1.143157705  | 2.86E-06 | 0.000189509 |
| KERA          | 1.752572673 | 5.913147461 | 1.754451986  | 2.86E-06 | 0.000189509 |
| LINC00656     | 1.765659185 | 4.533529315 | 1.360427719  | 3.15E-06 | 0.000203087 |
| TMEM132B      | 18.11600975 | 37.93528212 | 1.066275046  | 3.18E-06 | 0.000204269 |
| GIP           | 1.787787903 | 3.845374164 | 1.104948393  | 3.26E-06 | 0.000208836 |
| GPR174        | 20.85671604 | 8.41880979  | -1.308823826 | 3.55E-06 | 0.000222552 |

## Hazard infiltrating immune cells in bladder urothelial carcinoma

|                |             |             |              |          |             |
|----------------|-------------|-------------|--------------|----------|-------------|
| RTP5           | 7.724542781 | 2.187044098 | -1.820467232 | 3.59E-06 | 0.000224246 |
| SH2D1A         | 126.869246  | 53.1837082  | -1.254286115 | 3.62E-06 | 0.000225721 |
| RP11-1094M14.5 | 11.96139358 | 5.21351319  | -1.1980577   | 3.83E-06 | 0.000235075 |
| NKAIN4         | 19.05228511 | 47.2896274  | 1.311559731  | 3.90E-06 | 0.000237476 |
| CLSTN2         | 140.7534379 | 349.1948616 | 1.310862169  | 3.94E-06 | 0.000239791 |
| PDCD1          | 185.1676458 | 67.115826   | -1.464107139 | 4.28E-06 | 0.000255605 |
| MFAP5          | 415.8417197 | 892.2143357 | 1.101355824  | 4.55E-06 | 0.000269477 |
| RP11-1094M14.8 | 41.63182295 | 19.47522086 | -1.096047042 | 4.58E-06 | 0.000269833 |
| FGFR1          | 1323.723519 | 3029.877203 | 1.194657501  | 4.67E-06 | 0.000272738 |
| JAKMIP1        | 72.55779522 | 31.29072215 | -1.213395664 | 4.82E-06 | 0.000279671 |
| IL21-AS1       | 15.30996822 | 6.399462521 | -1.258448642 | 4.98E-06 | 0.000284856 |
| ZCCHC5         | 1.803907212 | 4.978748377 | 1.464657972  | 5.08E-06 | 0.000289364 |
| CST6           | 956.5678384 | 2213.249432 | 1.21022686   | 5.44E-06 | 0.000304056 |
| MAP4K1         | 540.0690153 | 239.4890483 | -1.173184097 | 5.50E-06 | 0.000307029 |
| ABCB5          | 3.769642223 | 9.529490136 | 1.337971423  | 5.60E-06 | 0.000310298 |
| SPTLC1P4       | 0.910343325 | 2.045332425 | 1.167852693  | 5.71E-06 | 0.000313553 |
| PYHIN1         | 104.0318907 | 42.95878985 | -1.276000593 | 5.77E-06 | 0.000314355 |
| RETN           | 7.302585741 | 14.98522639 | 1.037061583  | 5.90E-06 | 0.000319169 |
| LINC00426      | 55.07337202 | 23.69033765 | -1.217056183 | 5.94E-06 | 0.00031975  |
| LIPN           | 2.969515964 | 11.96754689 | 2.010827765  | 5.96E-06 | 0.000320443 |
| TRIM63         | 28.05116162 | 56.60258587 | 1.012807449  | 6.33E-06 | 0.000334532 |
| LRRN4          | 14.70981396 | 34.60744925 | 1.23430361   | 6.55E-06 | 0.000343411 |
| RP11-260M19.2  | 0.617037494 | 1.555614158 | 1.334054208  | 6.82E-06 | 0.000352028 |
| FAM196B        | 3.480870248 | 8.5817728   | 1.301827669  | 6.95E-06 | 0.000355324 |
| OMD            | 33.72750728 | 86.41847203 | 1.357414027  | 7.22E-06 | 0.000365188 |
| LILRP2         | 9.053111229 | 3.508661467 | -1.367492924 | 8.06E-06 | 0.000399768 |
| SCUBE1         | 111.46256   | 53.46848464 | -1.059798499 | 8.08E-06 | 0.000399768 |
| TRGC1          | 23.658518   | 9.858777634 | -1.262879018 | 8.17E-06 | 0.00040349  |
| NKG7           | 689.2681133 | 252.5984542 | -1.448219465 | 8.37E-06 | 0.000407667 |
| TRAV17         | 8.945809966 | 4.08688577  | -1.130210192 | 8.86E-06 | 0.000428329 |
| KEL            | 158.0446464 | 57.20843421 | -1.466032403 | 8.89E-06 | 0.000428954 |
| KLHDC8A        | 25.31579107 | 71.30994591 | 1.494065743  | 9.08E-06 | 0.000433254 |
| TRAV21         | 10.33054044 | 3.944008054 | -1.389181328 | 9.20E-06 | 0.000437412 |
| LINC01429      | 2.506882145 | 5.111407874 | 1.027826546  | 9.91E-06 | 0.000464641 |
| LINC01449      | 0.595331292 | 1.390768443 | 1.224117604  | 1.02E-05 | 0.000473988 |
| AC104820.2     | 9.374374485 | 3.840228528 | -1.287530261 | 1.06E-05 | 0.000485382 |
| RP3-495K2.2    | 1.169653643 | 2.675562353 | 1.193760768  | 1.12E-05 | 0.000509765 |
| TSKS           | 21.68963571 | 58.49325014 | 1.431264331  | 1.13E-05 | 0.000511131 |
| CXCR3          | 168.4639138 | 68.98085199 | -1.288171735 | 1.16E-05 | 0.000522335 |
| ITK            | 238.5400056 | 112.9060254 | -1.079108761 | 1.22E-05 | 0.000546368 |
| LINC01048      | 1.19911198  | 2.456418941 | 1.03459024   | 1.36E-05 | 0.000586217 |
| TRAV12-2       | 13.57858253 | 5.877141652 | -1.208146308 | 1.38E-05 | 0.000594209 |
| RP11-567M16.1  | 4.956315525 | 10.81657979 | 1.12590445   | 1.39E-05 | 0.00059638  |
| LINC01050      | 2.746790546 | 6.624399857 | 1.270042855  | 1.39E-05 | 0.00059688  |
| COL6A6         | 20.66324326 | 44.37168425 | 1.102572601  | 1.41E-05 | 0.000604863 |
| KLKP1          | 0.944275876 | 4.735250557 | 2.326160446  | 1.46E-05 | 0.00062114  |
| FTH1P22        | 12.23580045 | 5.252223588 | -1.220108245 | 1.49E-05 | 0.000630802 |
| CYTL1          | 49.10607317 | 114.4465406 | 1.220700489  | 1.49E-05 | 0.000630802 |
| GZMB           | 1092.02488  | 299.7673136 | -1.86509074  | 1.50E-05 | 0.00063456  |

## Hazard infiltrating immune cells in bladder urothelial carcinoma

|               |             |             |              |          |             |
|---------------|-------------|-------------|--------------|----------|-------------|
| AL359753.1    | 3.344820721 | 1.342325412 | -1.317194428 | 1.54E-05 | 0.000646804 |
| CTC-303L1.1   | 3.514502452 | 1.624640021 | -1.113200372 | 1.56E-05 | 0.000652266 |
| SIRPG-AS1     | 2.669293006 | 0.984207431 | -1.439423363 | 1.60E-05 | 0.000663284 |
| IDO2          | 17.13422528 | 5.619572573 | -1.608348654 | 1.61E-05 | 0.000665369 |
| RP11-109E24.1 | 2.752395519 | 0.808904576 | -1.766646373 | 1.63E-05 | 0.000670851 |
| COLEC12       | 420.1006842 | 874.5704393 | 1.05783945   | 1.67E-05 | 0.000683959 |
| AHNAK2        | 2299.427379 | 5644.872088 | 1.295666255  | 1.72E-05 | 0.000697794 |
| TRBV7-6       | 5.661927829 | 2.268682432 | -1.319438684 | 1.73E-05 | 0.000700942 |
| TRBC1         | 21.04839958 | 10.34262539 | -1.025108094 | 1.78E-05 | 0.000713665 |
| ADRA1B        | 14.66595996 | 35.24700764 | 1.265029276  | 1.83E-05 | 0.000728776 |
| KLF17         | 5.878758338 | 14.48520557 | 1.30099678   | 1.96E-05 | 0.000766962 |
| SBSN          | 997.1851328 | 3405.118323 | 1.771771652  | 1.99E-05 | 0.000774558 |
| AKNAD1        | 12.18708606 | 93.63322946 | 2.9416674    | 2.03E-05 | 0.000787849 |
| HIST1H4E      | 28.78106351 | 85.53008937 | 1.571312144  | 2.17E-05 | 0.000830225 |
| MRO           | 20.06799259 | 42.52354694 | 1.083365628  | 2.21E-05 | 0.000842043 |
| ST13P20       | 1.505262075 | 4.622069809 | 1.618524359  | 2.35E-05 | 0.000893066 |
| DSC1          | 17.4766609  | 137.7091523 | 2.978122972  | 2.37E-05 | 0.000896102 |
| EPYC          | 33.64069978 | 126.9326615 | 1.91578372   | 2.48E-05 | 0.000925471 |
| TRBV2         | 9.672407333 | 3.968028788 | -1.285452509 | 2.50E-05 | 0.000934999 |
| TRGV2         | 3.250945248 | 1.120575735 | -1.536619101 | 2.57E-05 | 0.000956345 |
| KIF26A        | 113.3283531 | 255.6895444 | 1.17388432   | 2.69E-05 | 0.000985387 |
| AIM2          | 1543.016101 | 704.2705454 | -1.131551465 | 2.78E-05 | 0.001012067 |
| HTR4          | 1.878943838 | 0.911751819 | -1.043208867 | 3.05E-05 | 0.001089935 |
| TCHHL1        | 6.966676701 | 27.71013364 | 1.991871149  | 3.09E-05 | 0.001097046 |
| TRAV8-3       | 8.72264061  | 3.98683791  | -1.129519997 | 3.24E-05 | 0.001130352 |
| TRAC          | 1218.051787 | 589.5551493 | -1.046876792 | 3.40E-05 | 0.001175966 |
| TRAV6         | 3.412985112 | 1.35988871  | -1.327545531 | 3.42E-05 | 0.001178608 |
| TRAV16        | 4.631913457 | 2.082791179 | -1.153090096 | 3.74E-05 | 0.001254869 |
| SPSB4         | 22.99662376 | 65.35915201 | 1.506967198  | 4.04E-05 | 0.001332969 |
| AC090617.1    | 0.561770054 | 1.142048456 | 1.023572239  | 4.08E-05 | 0.001337338 |
| SLC22A2       | 2.8739344   | 13.599672   | 2.24247282   | 4.08E-05 | 0.001337338 |
| PAEP          | 34.62285357 | 90.68656002 | 1.389164121  | 4.22E-05 | 0.001374915 |
| CTSV          | 664.2910466 | 1467.483922 | 1.143457322  | 4.35E-05 | 0.001403612 |
| CORO6         | 182.9047345 | 400.2703348 | 1.129882278  | 4.56E-05 | 0.001461725 |
| RP11-417L19.2 | 1.59996189  | 4.52316787  | 1.499295999  | 4.71E-05 | 0.001490885 |
| RP11-277P12.9 | 21.45676247 | 10.40278127 | -1.044463114 | 4.69E-05 | 0.001490885 |
| RP1-122P22.4  | 36.44588195 | 104.9710025 | 1.526163131  | 4.74E-05 | 0.001497073 |
| LCE3D         | 11.5864787  | 208.0826339 | 4.166642484  | 4.92E-05 | 0.001541128 |
| EOMES         | 82.1642204  | 31.7493369  | -1.371783827 | 4.99E-05 | 0.001557603 |
| ENPP1         | 150.7744405 | 661.7018501 | 2.133789432  | 5.19E-05 | 0.001610301 |
| MMP3          | 659.2607558 | 1566.998977 | 1.249083129  | 5.26E-05 | 0.001626591 |
| C6orf15       | 31.87627561 | 291.6909981 | 3.193885883  | 5.54E-05 | 0.001693428 |
| AC008063.3    | 0.711298582 | 1.896219393 | 1.414598701  | 5.57E-05 | 0.001694138 |
| SIT1          | 171.7007243 | 65.4306305  | -1.391858048 | 5.57E-05 | 0.001694138 |
| GPR18         | 53.53166594 | 22.05164635 | -1.279506181 | 5.60E-05 | 0.001698141 |
| RP11-674P19.2 | 1.448388364 | 4.056113424 | 1.485649504  | 5.69E-05 | 0.001716544 |
| TRBV10-2      | 3.383581075 | 1.201088042 | -1.494209051 | 5.79E-05 | 0.001743659 |
| PDGFR1        | 210.383586  | 425.543973  | 1.016286068  | 5.84E-05 | 0.001753309 |
| BIRC7         | 17.42172671 | 44.66632472 | 1.358299931  | 5.99E-05 | 0.001790741 |

## Hazard infiltrating immune cells in bladder urothelial carcinoma

|                |             |             |              |             |             |
|----------------|-------------|-------------|--------------|-------------|-------------|
| LGALS17A       | 101.1170776 | 19.18534511 | -2.397950052 | 6.27E-05    | 0.001856471 |
| TRBV5-1        | 23.75472421 | 10.97099231 | -1.114520435 | 6.45E-05    | 0.001903849 |
| RP11-367F23.2  | 3.900880136 | 15.42787784 | 1.983668054  | 6.59E-05    | 0.001933848 |
| P2RY10         | 61.12231251 | 29.66312011 | -1.043028772 | 6.98E-05    | 0.002018523 |
| TBC1D10C       | 523.2817781 | 248.9296428 | -1.071849983 | 7.05E-05    | 0.002028308 |
| CDSN           | 14.47231349 | 42.17562288 | 1.543113811  | 7.05E-05    | 0.002028308 |
| TRBV12-4       | 6.761127043 | 3.351418695 | -1.012491821 | 7.11E-05    | 0.002033538 |
| LINC00520      | 18.69536518 | 78.54116741 | 2.07076839   | 7.11E-05    | 0.002033538 |
| AC112721.2     | 10.29351199 | 23.12347161 | 1.16762272   | 7.22E-05    | 0.00205073  |
| SHOX2          | 86.84666222 | 177.1875744 | 1.028735128  | 7.42E-05    | 0.002098451 |
| TRBV9          | 14.3690393  | 5.317411604 | -1.434167557 | 7.56E-05    | 0.002126419 |
| RP11-95H3.1    | 1.391269538 | 3.562347448 | 1.356426286  | 7.59E-05    | 0.002129355 |
| TRAV12-3       | 8.98712989  | 4.20004254  | -1.097456513 | 7.77E-05    | 0.002169587 |
| RP11-68I3.10   | 2.063230728 | 4.158766586 | 1.01125055   | 7.79E-05    | 0.002169587 |
| CACNG8         | 13.32859672 | 33.14548598 | 1.314287509  | 7.95E-05    | 0.002192737 |
| RP11-44K6.2    | 9.246919496 | 3.593833979 | -1.363449065 | 8.24E-05    | 0.00225912  |
| AC006369.2     | 3.956528571 | 1.916675463 | -1.045629099 | 8.28E-05    | 0.002266173 |
| TRBV3-1        | 8.903515719 | 3.574018662 | -1.316827956 | 8.62E-05    | 0.002336459 |
| AC008063.2     | 1.113151664 | 2.413443544 | 1.11644291   | 8.70E-05    | 0.002353502 |
| PLXNA4         | 63.64669673 | 130.5850305 | 1.036831979  | 9.05E-05    | 0.002415387 |
| MYH2           | 2.631543586 | 5.61600736  | 1.093635536  | 9.25E-05    | 0.00245705  |
| TRAV8-6        | 12.40408705 | 5.246112485 | -1.241494909 | 9.46E-05    | 0.002504611 |
| FGF5           | 27.68015472 | 65.66036247 | 1.246170707  | 9.52E-05    | 0.002514615 |
| TRAV10         | 2.422858961 | 0.939698982 | -1.366439834 | 0.00010026  | 0.002613229 |
| AC012668.2     | 2.032365161 | 11.30783775 | 2.476091544  | 0.000100472 | 0.002616021 |
| TRAV5          | 4.362500403 | 1.942410191 | -1.167307369 | 0.000103063 | 0.002666851 |
| KLK8           | 184.1037383 | 368.485504  | 1.001088944  | 0.000108228 | 0.002776458 |
| CYP4F35P       | 182.7523488 | 84.20376791 | -1.117933251 | 0.00011017  | 0.002812991 |
| LINC00158      | 5.941093908 | 1.565424888 | -1.924174306 | 0.000114196 | 0.002886357 |
| TRBV4-2        | 12.56326385 | 6.217671198 | -1.014765084 | 0.000117105 | 0.002947988 |
| TRBV29-1       | 19.23293861 | 7.564565065 | -1.346250169 | 0.000120364 | 0.00302644  |
| DCSTAMP        | 9.918295788 | 42.59344218 | 2.10246717   | 0.000125085 | 0.003102098 |
| PCAT29         | 5.59682003  | 2.117410915 | -1.402306085 | 0.000126273 | 0.003124708 |
| RP11-116D17.1  | 6.27374809  | 2.440028835 | -1.362429405 | 0.000127966 | 0.003151707 |
| KIR3DL2        | 6.015523039 | 0.959540537 | -2.648274521 | 0.000130696 | 0.003207815 |
| SLC19A3        | 52.64467706 | 109.6352406 | 1.058352034  | 0.000134367 | 0.003258109 |
| LYVE1          | 134.4202252 | 437.9460118 | 1.704002806  | 0.000134825 | 0.003262906 |
| TRAV4          | 10.86675901 | 4.564579281 | -1.251367926 | 0.000140512 | 0.003367981 |
| LY6G6C         | 86.84337249 | 255.5859203 | 1.557320705  | 0.000142111 | 0.003396568 |
| LAMP5          | 112.4389855 | 232.6199911 | 1.048832744  | 0.000146268 | 0.003479317 |
| RP11-1028N23.3 | 3.248270947 | 1.617813862 | -1.005626349 | 0.000147419 | 0.003503368 |
| CXCL13         | 1964.486915 | 588.5564423 | -1.738899877 | 0.000150281 | 0.003554526 |
| CXCL9          | 4671.5155   | 1543.678235 | -1.597518587 | 0.000151813 | 0.003573875 |
| KIAA1644       | 107.4828041 | 217.8629191 | 1.019314802  | 0.000151813 | 0.003573875 |
| RP11-184A2.2   | 1.407964748 | 2.881506964 | 1.033212294  | 0.000153351 | 0.003606693 |
| RP11-567M16.2  | 0.946661735 | 2.232590986 | 1.237798058  | 0.000154505 | 0.003627027 |
| RP11-143006.1  | 1.167877801 | 2.515265076 | 1.106821121  | 0.000155997 | 0.003655208 |
| ENDOU          | 14.09227987 | 73.51786711 | 2.38318988   | 0.000157021 | 0.003668895 |
| TRAV24         | 3.366264074 | 1.148828725 | -1.550984629 | 0.000159522 | 0.003710566 |

## Hazard infiltrating immune cells in bladder urothelial carcinoma

|               |             |             |              |             |             |
|---------------|-------------|-------------|--------------|-------------|-------------|
| HLA-DOA       | 1821.685971 | 887.9223997 | -1.036768781 | 0.000163501 | 0.003781503 |
| IL36B         | 3.357261375 | 13.23653397 | 1.979168631  | 0.000163439 | 0.003781503 |
| GFY           | 8.60057541  | 42.95930015 | 2.320465401  | 0.000166154 | 0.00381818  |
| PSG9          | 4.357768983 | 16.36122544 | 1.908619186  | 0.000174192 | 0.003966499 |
| CD7           | 691.0386481 | 339.7161007 | -1.024436804 | 0.000186328 | 0.004163367 |
| CD27          | 256.1009439 | 122.5068631 | -1.063849996 | 0.00019588  | 0.004307633 |
| CARMN         | 61.43887299 | 140.1257041 | 1.189497965  | 0.000203175 | 0.004440773 |
| TRGV3         | 3.711261222 | 1.770174446 | -1.06801801  | 0.000210179 | 0.004547844 |
| RAET1L        | 49.00502254 | 105.2716989 | 1.103116113  | 0.000213849 | 0.004586043 |
| TRBV7-9       | 25.99499755 | 10.57579228 | -1.297468274 | 0.00021526  | 0.004608398 |
| RP11-120C12.3 | 1.281344266 | 6.204436679 | 2.275642084  | 0.000217614 | 0.004638983 |
| KIR2DS4       | 23.8053517  | 2.479341756 | -3.26325689  | 0.000221681 | 0.004693707 |
| TRBV5-5       | 2.701692203 | 1.248585026 | -1.113569253 | 0.000228932 | 0.00481282  |
| C4orf26       | 51.31294193 | 103.9777453 | 1.018880129  | 0.000243238 | 0.005026918 |
| CD36          | 1632.563063 | 4839.477039 | 1.567712435  | 0.000255922 | 0.005211645 |
| RP1-140J1.1   | 0.912527659 | 1.98689949  | 1.1225787    | 0.000258341 | 0.005243854 |
| TRBV21-1      | 2.072681097 | 0.751614375 | -1.463433596 | 0.000265179 | 0.005324609 |
| RP11-310H4.6  | 1.039940703 | 2.315163312 | 1.154612696  | 0.00026654  | 0.005338114 |
| RP11-75706.1  | 14.49081726 | 7.011891293 | -1.047263428 | 0.000295298 | 0.005713328 |
| CARD18        | 7.395122031 | 23.02943591 | 1.638833215  | 0.000304695 | 0.005852754 |
| GNLY          | 928.1712097 | 401.270675  | -1.209815221 | 0.000305114 | 0.005856316 |
| TRBV15        | 4.482392759 | 1.697475772 | -1.400878084 | 0.000308011 | 0.005902875 |
| HSPB3         | 9.357601456 | 27.43695984 | 1.551909942  | 0.000326153 | 0.006151726 |
| GRM6          | 18.85661823 | 47.358507   | 1.328552635  | 0.000335823 | 0.006300897 |
| RP4-529N6.2   | 0.927127263 | 5.641186397 | 2.605159317  | 0.000336519 | 0.006301732 |
| CLCA4         | 3566.497237 | 1474.369802 | -1.274409429 | 0.000352686 | 0.006501294 |
| CP            | 3607.845761 | 1429.411705 | -1.335716156 | 0.000367733 | 0.006718436 |
| RPE65         | 12.65812639 | 37.89348591 | 1.581885985  | 0.000368413 | 0.006725952 |
| WNT9B         | 4.419997127 | 12.4077649  | 1.489125919  | 0.000368733 | 0.006726885 |
| SLAMF6        | 215.3855831 | 98.39956817 | -1.130197796 | 0.000379675 | 0.006861543 |
| ANXA10        | 2421.00856  | 994.9097359 | -1.282970634 | 0.000389952 | 0.007001803 |
| LPA           | 39.90593805 | 16.45618263 | -1.277973727 | 0.000397676 | 0.007074567 |
| AC002331.1    | 27.88583766 | 11.61013491 | -1.264147872 | 0.000408752 | 0.007184394 |
| BTLA          | 47.19239748 | 23.37645027 | -1.013498593 | 0.00040853  | 0.007184394 |
| LY6H          | 23.06199427 | 78.96128411 | 1.775628177  | 0.000412306 | 0.007214279 |
| RP11-342M1.7  | 3.283776645 | 16.57676574 | 2.335734646  | 0.000440162 | 0.007598336 |
| KRTDAP        | 683.8469756 | 2471.009744 | 1.853355265  | 0.000440567 | 0.007600079 |
| ZFP42         | 37.08675272 | 109.5258052 | 1.562294964  | 0.000446015 | 0.0076782   |
| FCMR          | 453.7470206 | 219.576214  | -1.04716639  | 0.000446423 | 0.007679954 |
| NLRP12        | 9.725478156 | 30.24016026 | 1.636624698  | 0.000449252 | 0.007712717 |
| SP140         | 312.1590989 | 154.8006912 | -1.011869605 | 0.000452097 | 0.007735059 |
| SPRR2E        | 233.596556  | 1243.334793 | 2.412123915  | 0.000478263 | 0.008072469 |
| TRAV22        | 4.131320825 | 1.80346945  | -1.195828115 | 0.000521667 | 0.008591059 |
| DSC2          | 2937.19047  | 6126.92854  | 1.060727201  | 0.000527284 | 0.008643585 |
| HMGB3P32      | 2.173554079 | 1.028305874 | -1.079786527 | 0.000542871 | 0.008818311 |
| RP11-540011.6 | 0.947375225 | 2.28619306  | 1.270939389  | 0.000555604 | 0.008972767 |
| SPRR2G        | 58.43423975 | 455.8707732 | 2.963739044  | 0.000568519 | 0.009140085 |
| LINC00545     | 0.925955255 | 2.759701328 | 1.575497753  | 0.000571949 | 0.009189331 |
| KCNH2         | 171.2781747 | 501.0451172 | 1.548599193  | 0.000582509 | 0.009317175 |

Hazard infiltrating immune cells in bladder urothelial carcinoma

|                |             |             |              |             |             |
|----------------|-------------|-------------|--------------|-------------|-------------|
| LINC00922      | 5.761701381 | 12.18430044 | 1.080456626  | 0.000588379 | 0.00939306  |
| PTGIS          | 1100.069098 | 2218.107407 | 1.01173508   | 0.000597134 | 0.009508583 |
| CTA-833B7.2    | 6.485190229 | 28.20966166 | 2.120968564  | 0.000606441 | 0.009626227 |
| RP11-212I21.3  | 0.928298565 | 1.901057599 | 1.03414145   | 0.000612765 | 0.009696734 |
| TRBV19         | 19.64383288 | 9.816804867 | -1.00075101  | 0.000613208 | 0.009696734 |
| RP11-442J21.2  | 2.61896279  | 6.213801951 | 1.246480698  | 0.000639403 | 0.009947683 |
| ZNF114         | 139.4101978 | 286.4906789 | 1.039152103  | 0.000639131 | 0.009947683 |
| PRR9           | 203.2423296 | 565.4947968 | 1.476312844  | 0.000638102 | 0.009947683 |
| RP11-119J18.1  | 2.830513339 | 6.882012243 | 1.281766736  | 0.000653488 | 0.010091593 |
| FCRL6          | 39.58793965 | 16.92524238 | -1.225884491 | 0.000654062 | 0.010093062 |
| RP11-47I22.2   | 14.9604218  | 31.36709128 | 1.0681009    | 0.000680709 | 0.010396592 |
| SPRR2B         | 12.47249762 | 88.73448892 | 2.83074456   | 0.00069458  | 0.01055694  |
| ZNF80          | 7.17909911  | 3.458135993 | -1.05380821  | 0.0007024   | 0.010633103 |
| RHOT1P1        | 8.68776887  | 4.101473812 | -1.082843305 | 0.000707859 | 0.010681    |
| AC092484.1     | 1.688734866 | 62.6706819  | 5.213775945  | 0.000712225 | 0.010733936 |
| DDN            | 29.13517753 | 60.22536865 | 1.047609218  | 0.000713825 | 0.010745129 |
| LAG3           | 649.5064997 | 295.5605741 | -1.135890127 | 0.000720403 | 0.010824621 |
| SLAMF1         | 178.6017863 | 78.25901341 | -1.190417682 | 0.000724819 | 0.010851917 |
| RP11-275N1.1   | 1.071708998 | 3.543322923 | 1.72518973   | 0.000731737 | 0.010935888 |
| RNF222         | 18.6249587  | 38.25888824 | 1.038557725  | 0.000733718 | 0.010958962 |
| C1orf105       | 4.524619812 | 16.59229471 | 1.874644947  | 0.000750265 | 0.011113327 |
| AC002066.1     | 5.306503114 | 11.61774191 | 1.130496315  | 0.000757879 | 0.011212856 |
| KRT79          | 129.8869281 | 537.7771092 | 2.049752103  | 0.000760834 | 0.011246675 |
| SRD5A2         | 101.6638177 | 24.78122483 | -2.036486912 | 0.000765523 | 0.011295356 |
| CTC-518B2.8    | 30.62771953 | 71.45199893 | 1.222136421  | 0.000773708 | 0.011373147 |
| LCE3E          | 5.115957563 | 79.48351593 | 3.957579489  | 0.000798091 | 0.011635958 |
| HNF4G          | 174.7380872 | 86.8145808  | -1.00918483  | 0.000816069 | 0.011836823 |
| KLK15          | 1.005798652 | 3.008282416 | 1.580598488  | 0.000838079 | 0.012031271 |
| OLAH           | 3.096841798 | 6.390124137 | 1.045046273  | 0.00085986  | 0.012237367 |
| TRBV18         | 10.02300956 | 4.944464246 | -1.019429652 | 0.000863119 | 0.012262845 |
| RP11-308D13.3  | 2.420829015 | 5.176782559 | 1.096554537  | 0.000895155 | 0.012596541 |
| RP11-354E11.2  | 6.246952458 | 36.01274878 | 2.527283266  | 0.000896156 | 0.012596896 |
| TRBV5-6        | 8.085603678 | 3.453677702 | -1.227222034 | 0.000899645 | 0.012631343 |
| GZMK           | 169.2436819 | 72.29387525 | -1.227156645 | 0.000933274 | 0.012951055 |
| AC105053.3     | 4.101415863 | 1.988839271 | -1.044195345 | 0.000945166 | 0.013043808 |
| TRAV2          | 6.934333222 | 3.385151457 | -1.034536782 | 0.000974125 | 0.013312052 |
| TRBV11-2       | 7.057594564 | 2.992200284 | -1.237969809 | 0.00097658  | 0.013330449 |
| LINC00704      | 41.6973845  | 97.79318865 | 1.229777092  | 0.000991748 | 0.013464128 |
| CLDN6          | 84.63886422 | 281.1463746 | 1.73192927   | 0.00099439  | 0.013492674 |
| RP11-150012.6  | 30.70685697 | 71.44697264 | 1.218312031  | 0.001028486 | 0.013813177 |
| ZNF676         | 24.87675365 | 51.21582216 | 1.041791343  | 0.001139001 | 0.014905801 |
| TRDC           | 92.02575988 | 42.26015325 | -1.122739758 | 0.001152877 | 0.015032417 |
| NOG            | 35.42680266 | 117.3999919 | 1.728519139  | 0.001181474 | 0.015278912 |
| RP11-69L16.6   | 6.67520169  | 13.63419859 | 1.030346569  | 0.001211299 | 0.015559287 |
| PEG3           | 123.2639157 | 270.619313  | 1.134514275  | 0.001221055 | 0.015652496 |
| FRMPD2B        | 2.510211227 | 1.187978735 | -1.079299756 | 0.001225393 | 0.01569205  |
| AC073850.6     | 3.080052322 | 9.802004109 | 1.670121893  | 0.001239694 | 0.015842789 |
| RP11-465L10.10 | 9.541078558 | 23.1537282  | 1.279020246  | 0.001268325 | 0.016104707 |
| NPW            | 17.97615277 | 36.86565292 | 1.036193018  | 0.001268548 | 0.016104707 |
| HMP19          | 15.21781022 | 43.97553521 | 1.53094036   | 0.001289279 | 0.016285353 |



Hazard infiltrating immune cells in bladder urothelial carcinoma

|               |             |             |              |             |             |
|---------------|-------------|-------------|--------------|-------------|-------------|
| FMN2          | 19.883854   | 45.47348058 | 1.193428018  | 0.001291336 | 0.016303113 |
| RP5-1171110.5 | 106.287454  | 52.2486402  | -1.024505917 | 0.001317755 | 0.016569837 |
| PPBP          | 13.1307287  | 85.29051199 | 2.699438278  | 0.001338441 | 0.016796222 |
| PCSK1         | 68.53268464 | 142.0974678 | 1.052016737  | 0.001344971 | 0.016835994 |
| RPS20P22      | 2.314133324 | 7.579761016 | 1.711680378  | 0.001355011 | 0.016936281 |
| TOMM20P2      | 6.130765179 | 2.928243463 | -1.066031639 | 0.001356748 | 0.016949532 |
| RP11-973F15.2 | 0.385718511 | 2.30688974  | 2.580328763  | 0.00136491  | 0.017026025 |
| CTD-228808.1  | 5.551808074 | 2.132042771 | -1.380721314 | 0.001415892 | 0.017479189 |
| MIR155HG      | 81.85243752 | 40.21016698 | -1.025465053 | 0.001417354 | 0.017488609 |
| CTB-134H23.2  | 6.909802412 | 2.326691754 | -1.570364365 | 0.001420283 | 0.017513621 |
| SPRR1B        | 1944.797063 | 5809.686505 | 1.578840697  | 0.001450603 | 0.017750952 |
| CTSE          | 4605.786122 | 1250.641453 | -1.880779177 | 0.001486836 | 0.018026263 |
| SPRR2D        | 423.7572013 | 1403.837709 | 1.728066372  | 0.001496527 | 0.018117449 |
| RP11-25L3.3   | 2.040473537 | 6.583449965 | 1.689939806  | 0.00161247  | 0.019132714 |
| PCNPP3        | 1.945676787 | 6.738065977 | 1.792062483  | 0.001616756 | 0.019173346 |
| UTS2          | 92.62123222 | 11.08536897 | -3.06268616  | 0.001643712 | 0.019356696 |
| CYP2F1        | 13.33627426 | 36.11158958 | 1.437106248  | 0.001647193 | 0.019379474 |
| AC004160.4    | 0.745342483 | 1.501960224 | 1.010871209  | 0.001722322 | 0.019926434 |
| NOTUM         | 189.3616745 | 3238.294918 | 4.096018107  | 0.00181021  | 0.020647609 |
| CTC-353G13.1  | 1.282333484 | 3.15553179  | 1.299111659  | 0.001823551 | 0.020752524 |
| CTD-2194D22.3 | 4.57340598  | 12.21587454 | 1.417416252  | 0.001828587 | 0.020781513 |
| AC006262.5    | 266.6104839 | 600.2383975 | 1.170802099  | 0.001899797 | 0.021426728 |
| TRBV5-4       | 8.342910751 | 3.657683042 | -1.189620749 | 0.00192574  | 0.021679071 |
| POM121L9P     | 16.77161141 | 39.17406946 | 1.223877696  | 0.002115332 | 0.023188114 |
| ANGPTL1       | 79.82607101 | 231.157223  | 1.533942534  | 0.002133264 | 0.023343814 |
| CD52          | 1099.218429 | 496.8697458 | -1.145538492 | 0.002133264 | 0.023343814 |
| PGBD4P1       | 1.650639576 | 0.663366809 | -1.3151464   | 0.002144594 | 0.023447307 |
| TRBV12-3      | 3.809056893 | 1.751816725 | -1.120581989 | 0.002155438 | 0.023483866 |
| KRTAP2-3      | 6.723058469 | 27.18039687 | 2.01537692   | 0.002157332 | 0.023484641 |
| NEU2          | 0.258887702 | 2.962732751 | 3.516530156  | 0.002194633 | 0.023755904 |
| RP11-59N23.1  | 0.723087139 | 1.633153213 | 1.17541872   | 0.00221222  | 0.023898447 |
| RP11-662I13.2 | 2.540184665 | 5.857478987 | 1.205346492  | 0.002219753 | 0.023945041 |
| CDH16         | 36.26852336 | 76.56260353 | 1.077921881  | 0.002246861 | 0.024143874 |
| CGB8          | 8.00547165  | 86.92584217 | 3.440726831  | 0.002335093 | 0.024810038 |
| KIR2DL3       | 7.793481775 | 1.561256775 | -2.319560171 | 0.002370078 | 0.024996093 |
| OGN           | 99.08771016 | 246.8579764 | 1.316903225  | 0.0023859   | 0.02505839  |
| FCRL3         | 115.0070575 | 40.73676673 | -1.497319012 | 0.002392585 | 0.025106609 |
| RP11-383J24.1 | 1.000645958 | 2.329306582 | 1.21896892   | 0.002395052 | 0.025111451 |
| HIST1H2BF     | 22.68207092 | 45.62857893 | 1.008385356  | 0.002412676 | 0.025232866 |
| AC011523.2    | 0.743441797 | 3.860757689 | 2.376592306  | 0.002416576 | 0.025263103 |
| CILP          | 580.5942572 | 1166.184894 | 1.006194333  | 0.002419438 | 0.025282466 |
| AVPR1A        | 151.6276473 | 336.5466613 | 1.15027371   | 0.002426178 | 0.025331771 |
| LEP           | 31.83520848 | 89.26624605 | 1.487491545  | 0.002458664 | 0.025628224 |
| CBLN4         | 2.849515263 | 7.025437653 | 1.301871581  | 0.002486793 | 0.02584406  |
| RP11-542M13.3 | 4.662615402 | 0.98261644  | -2.246439151 | 0.002666801 | 0.027186823 |
| SCN2B         | 8.272068392 | 18.86073759 | 1.189066078  | 0.002701186 | 0.027489433 |
| TMEM229A      | 3.582906082 | 11.45882979 | 1.677257588  | 0.002701972 | 0.027489433 |
| RP11-761N21.1 | 1.043339407 | 2.397920683 | 1.200575384  | 0.002762584 | 0.027884595 |
| AC007250.4    | 1.927599447 | 5.697328441 | 1.563480285  | 0.002791683 | 0.028105338 |

Hazard infiltrating immune cells in bladder urothelial carcinoma

|               |             |             |              |             |             |
|---------------|-------------|-------------|--------------|-------------|-------------|
| TRAV8-1       | 4.426329382 | 2.131368921 | -1.05433048  | 0.002832729 | 0.028415777 |
| LINC01522     | 1.016265932 | 3.897561534 | 1.939293831  | 0.002847945 | 0.028522723 |
| CRTAC1        | 4425.785122 | 1190.26624  | -1.894649094 | 0.002887177 | 0.028754686 |
| AARD          | 22.22792644 | 48.1324556  | 1.114636657  | 0.00292241  | 0.029013288 |
| RP3-492J12.2  | 1.875289743 | 0.647448849 | -1.534275394 | 0.003058013 | 0.029850782 |
| LCE2B         | 0.191290662 | 4.326903741 | 4.499496673  | 0.003089059 | 0.030083498 |
| IRX4          | 37.82972266 | 131.0710761 | 1.792757252  | 0.003133265 | 0.030387988 |
| RP11-445F12.2 | 0.704477428 | 1.915395215 | 1.443016714  | 0.003226458 | 0.03099803  |
| RP11-398B16.2 | 5.891009332 | 23.24903065 | 1.980583822  | 0.003253831 | 0.031179634 |
| L1TD1         | 6.116225825 | 18.90873627 | 1.628339366  | 0.003321383 | 0.031584665 |
| CXCL11        | 1808.755361 | 754.5351628 | -1.261337253 | 0.003371758 | 0.031882144 |
| RP11-71H17.8  | 2.078571857 | 4.475639977 | 1.106501366  | 0.003436578 | 0.03228785  |
| RP11-513N24.1 | 0.981305013 | 2.516019431 | 1.358369528  | 0.003449053 | 0.032344393 |
| RP11-116018.3 | 48.43318159 | 22.25582843 | -1.121812574 | 0.00346126  | 0.032434579 |
| RP11-116D17.4 | 2.887985133 | 1.052241621 | -1.456597294 | 0.003579197 | 0.033267686 |
| RTL1          | 17.08351114 | 50.39220354 | 1.560596024  | 0.003631343 | 0.033588584 |
| LY9           | 128.8897286 | 56.05799679 | -1.201145202 | 0.003714828 | 0.034121379 |
| PLD5          | 14.73984894 | 35.45923556 | 1.266439696  | 0.003775534 | 0.034464132 |
| TRAV25        | 3.286691783 | 1.599669559 | -1.03886225  | 0.003810076 | 0.034653152 |
| FGF16         | 1.704420869 | 6.956536802 | 2.029087642  | 0.003813222 | 0.034669182 |
| AC079610.2    | 8.437912372 | 3.04400949  | -1.470913248 | 0.00395898  | 0.035619571 |
| LCE2C         | 0.417195062 | 3.211882312 | 2.944625043  | 0.004052499 | 0.03608496  |
| RP11-373E16.3 | 0.684546569 | 1.546469428 | 1.175757718  | 0.004051292 | 0.03608496  |
| KRTAP3-1      | 5.722265365 | 157.2301377 | 4.780147565  | 0.004103958 | 0.036465396 |
| LINC01395     | 2.686108093 | 6.411325547 | 1.255105304  | 0.004127538 | 0.036609979 |
| U82695.9      | 1.521388524 | 3.339649244 | 1.13430796   | 0.004127538 | 0.036609979 |
| CLC           | 5.367112782 | 18.10187235 | 1.753920819  | 0.004150079 | 0.036744847 |
| LINC01077     | 0.764144971 | 2.417480478 | 1.661585968  | 0.004193653 | 0.037012904 |
| CR1L          | 16.72037572 | 6.945991608 | -1.267354693 | 0.004322695 | 0.037863815 |
| LIN28A        | 1.553110954 | 98.45988904 | 5.986303309  | 0.004407173 | 0.038376814 |
| IGFL1P1       | 43.05754558 | 88.04798816 | 1.032023956  | 0.004482406 | 0.038782488 |
| CTD-2114J12.1 | 7.172692139 | 3.163911583 | -1.180805426 | 0.004529984 | 0.039099599 |
| NF1P6         | 1.517821867 | 3.86072484  | 1.34686925   | 0.004561137 | 0.039287261 |
| LINC01510     | 0.756129471 | 2.11985729  | 1.487261954  | 0.004568143 | 0.039317632 |
| C1QTNF1-AS1   | 3.366360698 | 7.124756054 | 1.081650852  | 0.004588318 | 0.039412956 |
| ACP5          | 2152.814441 | 4643.214633 | 1.108899997  | 0.004605539 | 0.039506693 |
| DHRS7C        | 0.177532799 | 1.450116454 | 3.030011271  | 0.004688725 | 0.040028355 |
| RP11-93H12.4  | 0.885250141 | 1.876585254 | 1.083952761  | 0.004701158 | 0.040107156 |
| LCE3C         | 0.503624072 | 1.817340043 | 1.851409242  | 0.0047413   | 0.040298633 |
| RP11-25L3.1   | 0.609210511 | 1.512056848 | 1.311499643  | 0.004747223 | 0.040335289 |
| CGB5          | 15.39770422 | 268.5527934 | 4.124418561  | 0.004877416 | 0.041104402 |
| RP11-305F18.1 | 1.314996999 | 4.547532404 | 1.790024411  | 0.004882608 | 0.041122922 |
| PIWIL3        | 12.3405963  | 39.01669467 | 1.660679457  | 0.004902416 | 0.041236634 |
| TCHH          | 76.57223743 | 234.8830535 | 1.61704931   | 0.004917161 | 0.041289007 |
| NKD1          | 231.1153986 | 879.6477893 | 1.928312599  | 0.004930016 | 0.041369192 |
| RP11-148B18.1 | 3.206326766 | 8.916739629 | 1.475594829  | 0.00495508  | 0.041530006 |
| MS4A8         | 229.1943254 | 110.4887855 | -1.05267138  | 0.005015691 | 0.04191768  |
| PCDH11Y       | 6.895516497 | 3.072639324 | -1.16618019  | 0.005023033 | 0.041924999 |
| OPN4          | 3.031765013 | 6.279322213 | 1.050450907  | 0.005108295 | 0.042436947 |

## Hazard infiltrating immune cells in bladder urothelial carcinoma

|                 |             |             |              |             |             |
|-----------------|-------------|-------------|--------------|-------------|-------------|
| RP11-522B15.6   | 0.587511216 | 1.394114847 | 1.246661115  | 0.005161806 | 0.042656852 |
| RP1-300G12.2    | 0.844391862 | 2.1861837   | 1.372430053  | 0.00530634  | 0.043435688 |
| LCE1A           | 0.360463425 | 3.966414413 | 3.459910633  | 0.005322995 | 0.043529345 |
| FAM25A          | 52.06841784 | 176.9762944 | 1.765075652  | 0.00538133  | 0.043863183 |
| RP3-407E4.3     | 1.242126497 | 2.806101161 | 1.175754915  | 0.005386777 | 0.043879023 |
| ADAMTS9-AS1     | 29.61740369 | 60.88612396 | 1.039668296  | 0.005413264 | 0.044037491 |
| SERPINB7        | 151.3749665 | 494.0405715 | 1.706502883  | 0.005449564 | 0.044261026 |
| MARCO           | 341.8311433 | 703.27647   | 1.040808106  | 0.00545552  | 0.044272324 |
| BPIFB1          | 2028.862027 | 293.3761464 | -2.789847278 | 0.005531628 | 0.044660993 |
| KLK9            | 1.004289007 | 3.120442715 | 1.635576229  | 0.005605058 | 0.045070784 |
| LGALS7B         | 141.2409348 | 756.5289006 | 2.421236923  | 0.005623943 | 0.045179125 |
| AC005150.1      | 0.413566411 | 13.26616832 | 5.003488908  | 0.005631699 | 0.045226929 |
| RP11-402P6.9    | 5.762922114 | 27.6860955  | 2.264289181  | 0.005731329 | 0.045821366 |
| TRAV38-1        | 2.189598917 | 0.8948687   | -1.290918703 | 0.005773685 | 0.046101134 |
| RP11-1020M18.10 | 1.006254135 | 5.252858381 | 2.384107978  | 0.005824552 | 0.046315359 |
| RP11-654A16.1   | 0.263348762 | 0.816351696 | 1.632216143  | 0.005917825 | 0.04681923  |
| CASC17          | 0.29718727  | 2.86188186  | 3.267519895  | 0.005924821 | 0.046830206 |
| LVRN            | 27.68702864 | 152.3720592 | 2.46031624   | 0.006031223 | 0.047521259 |
| RP11-138H8.2    | 0.429168464 | 1.308478614 | 1.60827437   | 0.006117563 | 0.048005236 |
| KRT34           | 20.96417173 | 147.6209691 | 2.815899929  | 0.006131594 | 0.048030762 |
| RP11-221N13.4   | 1.26504895  | 2.617678567 | 1.049094745  | 0.006220161 | 0.04855176  |
| RTBDN           | 18.42611046 | 42.00493803 | 1.188807372  | 0.006266545 | 0.048764005 |
| KRT15           | 16696.68033 | 7230.93562  | -1.207307054 | 0.006314921 | 0.048940638 |
| LINC00302       | 0.464946992 | 2.159647987 | 2.215658027  | 0.006319666 | 0.048948663 |
| COL9A1          | 120.3313174 | 44.45877159 | -1.436472175 | 0.006329731 | 0.048989679 |
| TLL1            | 105.1001767 | 211.7067036 | 1.010301858  | 0.006379571 | 0.049152723 |
| RP11-432M8.17   | 1.104453942 | 24.67453369 | 4.481617659  | 0.006450985 | 0.049565727 |

## Hazard infiltrating immune cells in bladder urothelial carcinoma

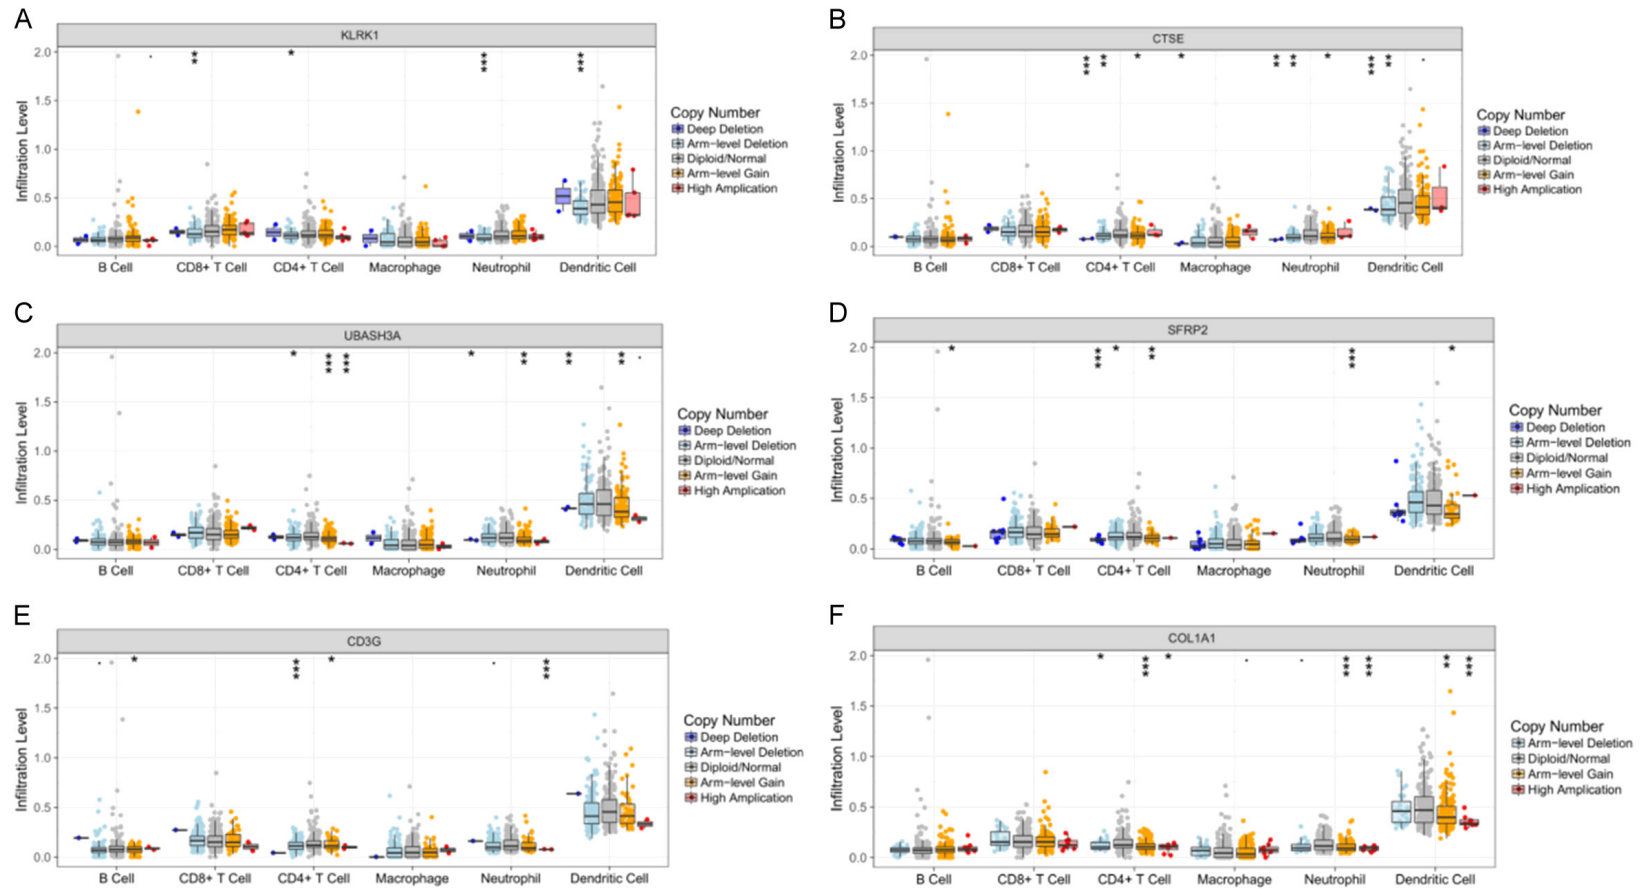

**Figure S1.** Associations of several hub TIICS-related signature mutants with immune cells infiltration based on “SCNA” module in TIMER database. A-F. Mutants of 6 identified signature conferred the low infiltration levels of immune cells, especially especially CD4<sup>+</sup> T cell, neutrophil and dendritic cell.
